## Intention to receive a COVID-19 vaccine: Results from a population-based survey in Canada

Gina S. Ogilvie<sup>a,b</sup>, Shanlea Gordon<sup>c,d</sup>, Laurie W. Smith<sup>e,c</sup>, Arianne Albert<sup>b,c</sup>, C. Sarai Racey<sup>b</sup>, Amy Booth<sup>b,c</sup>, Anna Gottschlich<sup>b,c</sup>, David Goldfarb<sup>b,f</sup>, Melanie C.M. Murray<sup>b,c</sup>, Liisa A.M. Galea<sup>g,c</sup>, Angela Kaida<sup>h,c</sup>, Lori A. Brotto<sup>b,c</sup>, Manish Sadarangani<sup>i,b</sup>.

a) BC Centre for Disease Control, Provincial Health Services Authority, 655 West 12<sup>th</sup> Avenue, Vancouver, British Columbia, V5Z 4R4

b) Faculty of Medicine, University of British Columbia, 2329 West Mall, Vancouver, British Columbia, Canada, V6T 1Z4

c) Women's Health Research Institute, 4500 Oak Street, Vancouver, British Columbia, Canada, V6H 2N9

d) BC Children's Hospital Research Institute, 938 W 28<sup>th</sup> Avenue, Vancouver, British Columbia, Canada, V5Z 4H4

e) BC Cancer Agency, 600 W 10<sup>th</sup> Avenue, Vancouver, British Columbia, Canada, V5Z 4E6

f) Department of Pathology and Laboratory Medicine, BC Children's and Women's Health Centre, 4500 Oak Street, Vancouver, British Columbia, Canada, V6H 3N1

g) Faculty of Arts, University of British Columbia, 2329 West Mall, Vancouver, British Columbia, Canada, V6T 1Z4

h) Faculty of Health Sciences, Simon Fraser University, 8888 University Drive, Burnaby, British Columbia, V5A 1S6

i) Vaccine Evaluation Centre, 950 W 28<sup>th</sup> Avenue, Vancouver, British Columbia, Canada, V5Z 4H4

### \*Corresponding Author:

Gina Ogilvie MD MSc FCFP DrPH  
4500 Oak Street  
BC Women's Hospital  
Vancouver, BC  
gina.ogilvie@cw.bc.ca

## Abstract

26  
27 **Background:** The success of any COVID-19 vaccine program ultimately depends on high vaccine uptake. This study determined  
28 overall intention to receive a COVID-19 vaccine and identified factors that predict intentions to be vaccinated against COVID-19 in  
29 Canada, specifically in key priority groups identified by the American Committee on Immunization Practice (ACIP) and the National  
30 Advisory Committee on Immunization (NACI) for early immunization.

31 **Methods:** Individuals from research cohorts from the general population of British Columbia aged 25-69 were invited complete an  
32 online survey based on validated scales and theoretical frameworks to explore intention to receive a COVID-19 vaccine. Two  
33 multivariable logistic regression models were conducted to determine factors associated with intention to receive the COVID-19  
34 vaccine.

35 **Results:** Of 4,948 respondents, 79.8% intended to receive a COVID-19 vaccine. In multivariable modeling, respondents who  
36 intended to receive the vaccine had higher vaccine attitudinal scores ( $p < 0.001$ ), reported greater influence of direct social norms ( $p =$   
37  $0.001$ ), and indirect social norms, including their family physician ( $p = 0.024$ ), and Provincial Health Officer ( $p = 0.011$ ). Older  
38 individuals ( $>60$  years) were more likely to intend to receive the vaccine, while females (95%CI 0.57,0.93), those with less than high  
39 school education (95%CI 0.5,0.76), those who self-identified as non-white (95%CI 0.60,0.92), self-identified as Indigenous (95%CI  
40 0.36,0.84) and essential non-health care workers (95%CI 0.59,0.86) had lower adjusted odds of intending to receive a COVID-19  
41 vaccine.

42 **Conclusions:** To optimize vaccine coverage, public health should focus on key messages around vaccine safety and benefit, and  
43 leverage trusted practitioners for messaging. As certain key populations identified by NACI and ACIP for early immunization report a  
44 lower intention to vaccinate, there is a need for in-depth education and support for these communities to ensure optimal uptake.

45 **Keywords**

- 46 • COVID-19
- 47 • Vaccine hesitancy
- 48 • Vaccine confidence
- 49 • Vaccine
- 50 • Canada
- 51 • Public health
- 52
- 53

## 54 **Background**

55 The development of safe and effective COVID-19 vaccines is a critical step in ending the pandemic.<sup>1,2</sup> Across Canada vaccine  
56 distribution has commenced. The Pfizer and Moderna vaccines, both of which show approximately 95% protection against COVID-  
57 19<sup>3,4</sup>, are currently being distributed in each province, including British Columbia. Global health authorities including the World Health  
58 Organization (WHO)<sup>5</sup> and the American Committee on Immunization Practice (ACIP)<sup>6</sup> have provided guidance for vaccine roll-out  
59 globally with the acknowledgment that initial vaccine supply will be limited. In Canada, the National Advisory Committee on  
60 Immunization (NACI) has identified priority populations for initial vaccine roll-out, including populations at high risk for severe COVID-  
61 19 related illness; those most likely to transmit COVID-19 to those at high risk; those essential to maintaining the COVID-19  
62 response; those who contribute to the maintenance of essential services; and those living or working in conditions that put them at  
63 higher risk for infection.<sup>7</sup> ACIP had identified similar priority populations for early vaccine distribution in the United States, including  
64 healthcare personnel, persons with high-risk underlying medical conditions, and individuals over 65 years<sup>6</sup>.

65 Ultimately, the success of any COVID-19 vaccine program depends upon vaccine uptake in the population. Over the past decade  
66 there has been a significant rise in “vaccine hesitancy”, a complex concept defined as the refusal, reluctance, or delay in acceptance  
67 to vaccinate despite vaccine availability<sup>2,8,9</sup>, which has led to decreases in vaccine uptake.<sup>10,11,12,13</sup> Understanding the predictors and  
68 determinants influencing intentions to receive a COVID-19 vaccine in Canada are key to designing public health programming to  
69 optimize vaccination rates, including among priority populations, when vaccine is available broadly.<sup>6,7</sup> When evaluating vaccine  
70 intention, assessments should be based on validated theoretical frameworks in order to provide robust information for program  
71 planning. Using a survey based on the WHO Vaccine Hesitancy Scale (VHS) and grounded in the Theory of Planned Behaviour

72 (TPB), the primary objective of this study was to determine the intention to receive a COVID-19 vaccine among people living in  
73 British Columbia. The secondary objectives were to identify factors that predict intentions to be vaccinated, specifically in priority  
74 groups identified by NACI, in order to guide public health vaccination programs.

75 British Columbia is the western most province in Canada, and has a population of more than 5 million. Over 80% of the population  
76 lives in a population centre<sup>14</sup>. Building on a well-established vaccine program, COVID-19 vaccine distribution in BC will be centrally  
77 organized by the BC Center for Disease Control, with regional delivery coordinated by regional Health Authorities<sup>15</sup>.

78

## 79 **Methods**

80 The current study is part of a larger, ongoing investigation led by the Women's Health Research Institute evaluating the impacts of  
81 COVID-19 and public health controls on British Columbians.<sup>16</sup>

### 82 *Participants and recruitment*

83 Prospective participants were part of large research cohorts from the general population of British Columbia (BC) who had consented  
84 to be contacted for future research. Eligible individuals (aged 25-69; resident of BC) were sent an email invitation to participate (*Index*  
85 *Participants*) in an online survey. To increase diverse sex and gender representation, respondents were asked to provide the email  
86 address of an adult household member who identified as another gender to participate in the survey – these individuals were then  
87 invited to participate in the online survey (*Household Participants*). All prospective participants received up to three email reminders,  
88 and an opportunity to participate in a draw for a gift card. Participants could also opt-in to receive an at-home SARS-CoV-2 (severe

89 acute respiratory syndrome coronavirus 2) research antibody test (data collection ongoing and will be reported separately). Ethical  
90 approval was received from The University of British Columbia Research Ethics Board (H20-01421). All methods performed as a part  
91 of this study were in accordance with the UBC Research Ethics Board guidelines. Informed consent was obtained from all  
92 participants prior to participation in this study.

93

#### 94 *Survey Design and Measures*

95 To determine the factors associated with intention to be vaccinated, existing items came from the validated WHO VHS<sup>9</sup> and new  
96 items were developed using TPB framework.<sup>17</sup> TPB is a psychological model of behavior change that has been used widely to predict  
97 and understand health-related behaviours and has been shown previously to accurately predict vaccine uptake in Canada.<sup>18,19,20,21,22</sup>  
98 TPB defines the most significant predictors of a health behaviour as attitudes, social norms (direct, indirect), and perceived  
99 behavioural controls.<sup>17</sup> For this survey, items were developed from a detailed literature review and through elicitation surveys of  
100 experts to identify key factors expected to influence intention to receive a COVID-19 vaccine (Additional File 1). The survey assessed  
101 vaccine attitudes (8 items), direct social norms (4 items), indirect social norms (14 items), and perceived behavioural controls (4  
102 items) (Additional File 2). Vaccine hesitancy was measured using the validated 9-item, 2-factor VHS initially developed by the WHO  
103 Sage Working Group on Vaccine Hesitancy<sup>8,9,12</sup>, and adapted for BC. The factors included in VHS are vaccine lack of confidence (7  
104 items) and vaccine risk (2 items).<sup>8</sup> All items in TPB and VHS scales were measured on a 5-point Likert scale. The overall survey was

105 assessed for face validity and comprehension, pilot tested, and the final version was implemented using REDCap (Research  
106 Electronic Data Capture).<sup>23</sup>

107 For each participant the following demographic characteristics were assessed: age, sex, gender, Indigenous ancestry, visible  
108 minority status, education, household composition, existing chronic health condition, self-reported history of COVID-19, and self-  
109 reported employment as an essential worker. Visible minority categories were based on the Statistics Canada 2016 census. The  
110 primary outcome was response to “*If a COVID-19 vaccine were to become available to the public, and recommended for you, how*  
111 *likely are you to receive it?*”

#### 112 *Survey response rate*

113 Response rate was calculated according to the American Association for Public Opinion Research (AAPOR) guidelines for Internet  
114 Surveys of Specifically Named Persons.<sup>24</sup> Response rate is defined as the sum of complete (100% of applicable questions  
115 answered) and partial surveys (<100% of applicable questions answered), divided by the overall number of invitations distributed to  
116 eligible respondents. Participant disposition is defined as: respondents (number of complete and partial surveys), ineligible (those  
117 who did not meet the eligibility criteria), invitation returned undelivered (number of emails bounced back), explicit refusals (those who  
118 replied that they did not want to participate), implicit refusals (those who visited the online survey but failed to complete any survey  
119 items), and nothing ever returned (those who did not respond to the survey invites).<sup>24</sup> With a sample size of 4,500, we had 80%  
120 power to detect +/- 1.34% 95%CI around an estimated overall vaccine acceptance rate of 70%.<sup>25</sup> We plan to compare ages of  
121 responders and non-responders to determine representativeness of the study participants.



122 *Analyses*

123 Analyses were carried out in R v.4.0.2.<sup>26</sup> Mean values for TPB and VHS scales were calculated. Item reliability for TPB scales was  
124 assessed using Cronbach's  $\alpha$ , and if  $\alpha > 0.6$  (good agreement), scales were included in bivariable and multivariable analysis. For the  
125 primary outcome (intention to receive a COVID-19 vaccine) responses on the 5-point Likert scale were dichotomized, with those who  
126 responded *very* or *somewhat likely* coded as "intending to vaccinate" and those who responses *neutral*, *unlikely*, or *very unlikely*  
127 coded as "not intending to vaccinate". We investigated the relationship between intention to get a COVID-19 vaccine and  
128 demographic and vaccine specific variables using mixed-effects logistic regressions. To allow participants to select more than one  
129 visible minority category, visible minority variables were coded as those who indicated a particular minority status vs. those who did  
130 not, and used as separate variables in analyses. Intention to vaccinate was examined in priority groups identified by ACIP and NACI,  
131 including older (>60), those with chronic health conditions, visible minorities, Indigenous participants, healthcare workers, and non-  
132 healthcare essential workers.<sup>7</sup> Two multivariable mixed-effects logistic regression models were conducted to explore factors  
133 associated with the dependent variable '*intention to receive a COVID-19 vaccine*'. One model examined demographic variables, and  
134 the other model included the VHS and TPB items. For both models, *a priori* predictors of vaccine intention which achieved a  $p < 0.1$   
135 from bivariable analysis were included in multivariable models, and adjusted odds ratios were calculated to identify factors  
136 associated with intention to receive the COVID-19 vaccine. Case-wise deletion was used to address missing data within each  
137 bivariable analysis. Multivariable analyses included only non-missing data. Clustering by household was accounted for in the mixed-  
138 effects models using a random effect for household identification. A descriptive analysis of male versus female respondents was  
139 completed for the WHO VHS scale and the TPB framework.

## 140 RESULTS

### 141 *Survey Respondents*

142 Between August 20 and September 27, 2020, 13,764 survey invites were distributed to prospective *Index Participants* and 4,292  
143 responded to the survey (Figure 1). Of the 1291 invites that were forwarded to prospective *Household Participants*, 656 responded.  
144 Overall, 4,058 surveys were completed and 890 were partially completed by eligible participants, for a response rate of 32.9%  
145 (4,948/15,055) overall (including all who were *sent* the survey), and 37.2% (4,948/13,299) (including only those who *received* the  
146 survey). We compared the ages of survey respondents and non-respondents (those who declined participation or did not  
147 respond) across five age strata (25-29; 30-39; 40-49; 50-59; 60-69). We found no significant differences between the ages of  
148 respondents and non-respondents, indicating representativeness of our sample based on age (data not shown).

### 149 *Demographics*

150 Survey respondents had a mean age of 51.8 (SD= 10.5) with a range from 25-69 years (Table 1). The majority of participants self-  
151 reported being assigned female sex at birth (84.8%), identified as women (84.1%), white (82.6%), and had more than a high school  
152 education (83.8%). Fifty-two participants (1.1%) identified as non-binary, GenderQueer, Agender, Two-Spirit, or other gender identity.  
153 Visible minority responses were grouped into broader categories for analyses. Essential health care workers comprised 12.0% of  
154 respondents and essential non-healthcare workers comprised 18.4%. Survey respondents were from all five health authorities in BC.

### 155 *Intention to receive a COVID-19 vaccine*

156 Overall, 79.8% were 'somewhat or very likely' to receive a COVID-19 vaccine if it was available to the public and recommended for  
157 them, adjusted for household clustering (Table 2). Among essential health care workers, 81.8% indicated that they intend to receive  
158 a COVID-19 vaccine. In bivariable analyses, those who were older (>60 years), males, had chronic health conditions, were essential  
159 health care workers, had more than a high school education, or had two adults in the house were significantly more likely to intend to  
160 receive the COVID-19 vaccine ( $p \leq 0.05$ ). Specifically, participants in all age groups except 25-29 were significantly less likely to  
161 intend to receive the COVID-19 vaccine compared to those in the 60-69 group. Individuals who were essential non-health care  
162 workers, identified as non-white, South Asian or of Indigenous ancestry were significantly less likely to intend to receive vaccination  
163 ( $p \leq 0.05$ ). Given there were fewer than 52 non-binary, GenderQueer, Agender, or Two-spirit respondents, sex, not gender, was used  
164 in the model. In multivariable modeling, individuals who were older (>60 years) were more likely to intend to receive the COVID-19  
165 vaccine (Table 2), while females (AOR 0.7; 95%CI 0.55, 0.89); those who had less than a high school education (AOR 0.62; 95%CI  
166 0.51, 0.77); those who self-identified as non-white (AOR 0.76; 95%CI 0.61, 0.95); those who self-identified as Indigenous (AOR 0.58;  
167 95%CI 0.38, 0.87); those who were essential non-health care workers (AOR 0.72; 95%CI 0.6, 0.87); and those who thought they had  
168 COVID-19 (AOR 0.76; 95% 0.61 – 0.96) had lower adjusted odds of intending to receive a COVID-19 vaccine if it were publicly  
169 available and recommended for them.

#### 170 *Vaccine Hesitancy Scale and Theory of Planned Behaviour*

171 All items in the TPB scale had good to strong agreement (Cronbach's  $\alpha > 0.6$ ) and were included in the analysis (Table 3). In  
172 bivariable modeling, all responses in the WHO and TPB scales were significantly different in individuals who intended to be  
173 vaccinated and those who did not, and were included in the multivariable analysis (Table 4). In multivariable modeling (Table 4),

174 participants who had higher vaccine confidence and who perceived a lower vaccine risk were more likely to intend to receive a  
175 COVID-19 vaccine ( $p < 0.001$ ). In the TPB scales, respondents who intended to vaccinate had significantly higher vaccine attitudinal  
176 scores ( $p < 0.001$ ), reported greater influence of direct social norms on their decision to vaccinate, including belief that most people  
177 who are important to them would think they should receive the COVID-19 vaccine, and would expect them to receive the vaccine ( $p <$   
178  $0.001$ ). Participants intending to be vaccinated were also significantly more likely to report greater influence of indirect social norms,  
179 including the opinions of family ( $p < 0.001$ ), their family physician or primary healthcare provider ( $p = 0.03$ ), and the Provincial Health  
180 Officer ( $p = 0.01$ ). Perceived behavioural controls and the influence of friends (indirect social norm) were not found to be predictors of  
181 intention to vaccinate. A descriptive analysis of male ( $n = 605$ ) versus female ( $n = 4,178$ ) respondents was completed for the TPB  
182 scale and the WHO VHS scale (Table 5).

183 **DISCUSSION**

184 To support COVID-19 vaccine implementation, this study investigated intention to receive the COVID-19 vaccine and determine  
185 predictors of COVID-19 vaccine uptake of adults living in BC. The majority (79.8%) of adults surveyed intend to receive a COVID-19  
186 vaccine if available to the public and recommended for them. In multivariable modeling, older individuals (>60 years) were more likely  
187 to intend to receive the COVID-19 vaccine. However, other key populations including essential non-health care workers, those who  
188 identified as non-white or Indigenous, as well as those with less than high school education indicated that they are less likely to  
189 intend to receive a COVID-19 vaccine. From the WHO and TPB scales, we found that those who report higher lack of confidence in  
190 vaccines and higher perceived risk of vaccines were less likely to indicate an intention to vaccinate. As well, overall attitudes to  
191 vaccines and social norms were significant predictors of intention to receive a COVID-19 vaccine. When we adjusted the  
192 multivariable models for sex, only negligible changes were observed in the results (data not shown). Understanding population-level  
193 intention to receive the COVID-19 vaccine is critical to success of COVID-19 vaccination programs and ultimately COVID-19  
194 pandemic control.<sup>2</sup>

195  
196 Our study findings are consistent with results from unpublished polls in Canada investigating COVID-19 vaccine intention, which  
197 have found that the majority of Canadians intend to get a COVID-19 vaccine when it becomes available.<sup>2,27,28</sup> In addition, our findings  
198 across demographic subgroups align with published trends in the United States, reporting that women, those with a high school  
199 education or less, younger adults (<65 years), and those who identify as Black are less likely to report intention to receive a COVID-  
200 19 vaccine.<sup>29</sup> A study published in the United Kingdom reported similar findings by age: older age was significantly associated with

201 increased likelihood of vaccination.<sup>30</sup> However, our findings contrast overall vaccine intention polls from the United States and the  
202 UK, which indicate that 57.6% and 53% of the population in those countries respectively intended to be vaccinated against COVID-  
203 19<sup>31,32</sup>

204

205 Results from the WHO VHS and the TPB scales provide important insights to guide public health programming (Table 4).  
206 Specifically, to instill confidence in COVID-19 vaccines, messaging should focus on the benefit of vaccines, including their impact on  
207 society overall and benefits to children, community, families and individuals. Information on vaccine safety from vaccine trials, as well  
208 as plans for ongoing, transparent monitoring and reporting of side effects of COVID-19 vaccines should be broadly shared to  
209 strengthen public confidence. As our findings show that family physicians and Provincial Health Officers are influential in vaccine  
210 decision making, public health leadership needs to utilize their influence to optimize COVID-19 vaccine coverage.

211

212 Leading health authorities, such as the WHO, have identified the need to ensure that everyone is protected by full immunization  
213 regardless of socioeconomic and gender-related barriers.<sup>33</sup> While findings from our study indicate older individuals are more likely to  
214 intend to receive the vaccine, in the priority populations identified by ACIP and NACI, the intention to vaccinate is not near to 100%.  
215 Priority populations, including essential non-health care workers, non-white, and Indigenous populations are less likely to intend to  
216 receive the vaccine, indicating that strong vaccine messaging is still needed. Public health leaders need to work specifically with  
217 these communities, to better understand their concerns and build confidence and trust in the vaccine program.

218

219 Additional Canada-wide research is needed to understand vaccine intentions, to determine if vaccine intentions vary by province.  
220 Future research investigating COVID-19 vaccine intentions should continue to incorporate validated scales and established  
221 theoretical frameworks like the VHS and TPB, rather than relying on unvalidated online polls.

222

### 223 *Limitations*

224 This study included a population of individuals who were recruited from large health research cohorts, and has a higher percentage  
225 of respondents who identified as female, white, with more than high school education, and were more likely to live in the southern  
226 part of the province compared to the general population of BC.<sup>34</sup> While we had a lower than expected response rate, there was no  
227 observed differences in age distribution between the responders and non-responders.

228

### 229 *Conclusion*

230 Our study shows that while the majority of respondents intend to receive the COVID-19 vaccine, there are important factors  
231 associated with intention to vaccinate, which can guide vaccination policies and immunization programs, and provide valuable  
232 recommendations for vaccine priority groups captured in our study sample, specifically older age groups, health care workers and

233 other essential workers. To our knowledge, this is the first study that has drawn from a large provincial sample in Canada, using  
234 established and rigorous theoretical frameworks to investigate intention to receive a COVID-19 vaccine.

235



236 **Declarations**

237 *Ethics approval and consent to participate*

238 Ethical approval was received from The University of British Columbia Research Ethics Board (H20-01421). All methods performed  
239 as a part of this study were in accordance with the UBC Research Ethics Board guidelines. Informed consent to participate was  
240 obtained from participants.

241 *Consent for publication*

242 Not applicable.

243 *Availability of data and materials*

244 The datasets generated and analysed during the current study are not publicly available. At the time of consent participants were not  
245 advised that data might be made publicly available, and so we felt it was not appropriate to make the data publicly available.  
246 Aggregate data may be made available by the corresponding author upon reasonable request.

247 *Competing interests*

248 The authors declare that they have no competing interests.

249 *Funding*

250 This work was supported by the BC Women's Foundation (Vancouver, British Columbia).

251 *Acknowledgements*

252 Not applicable.



**Figure 1: Study Participant CONSORT Diagram<sup>1</sup>**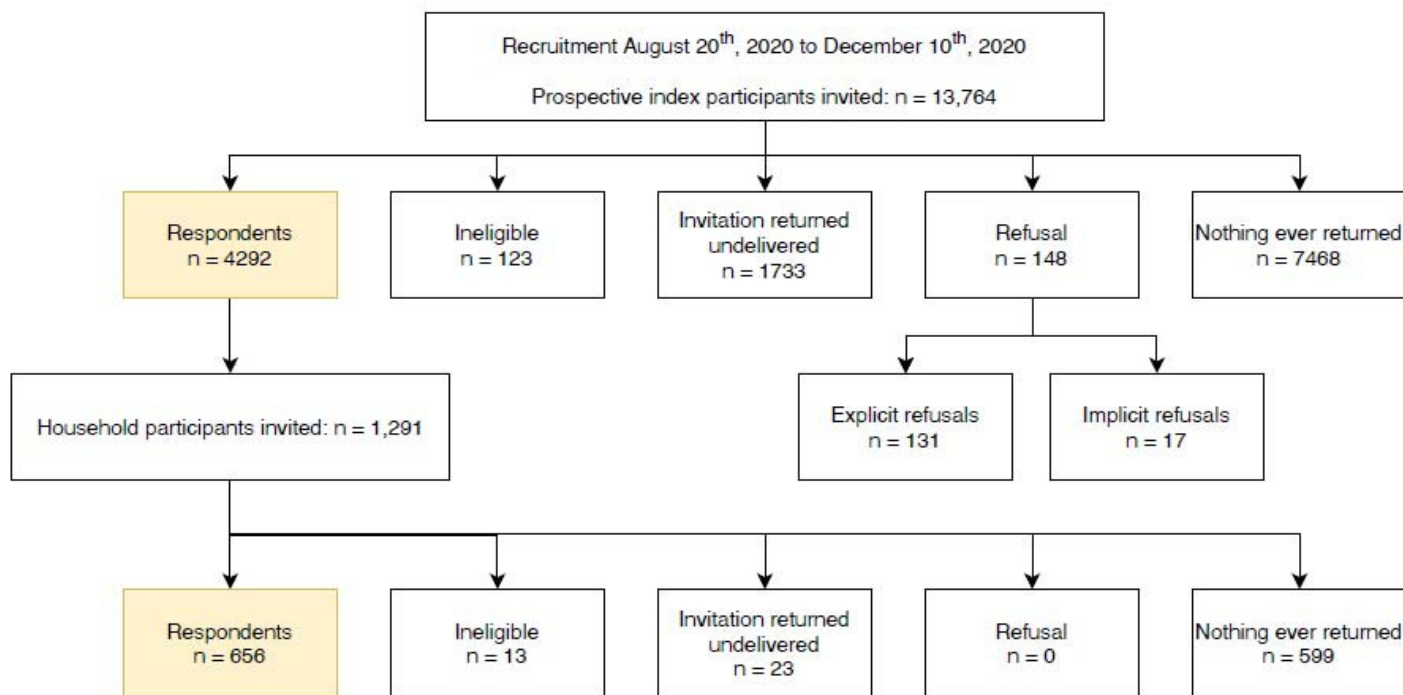<sup>1</sup> **American Association for Public Opinion Research:***Respondents:* number of complete and partial surveys*Ineligible:* those who did not meet the eligibility criteria (aged 25-69; resident of BC)*Invitation returned undelivered:* number of emails bounced back*Refusal:* those who declined to participate*Explicit refusals:* those who replied that they did not want to participate*Implicit refusals:* those who visited the survey URL but failed to complete any survey items*Nothing ever returned:* those who did not respond to the survey invites

**Table 1: Respondent Demographics (N=4,948)**

|                                                           | <b>Total<br/>N = 4948</b> |
|-----------------------------------------------------------|---------------------------|
| <b>Age</b>                                                |                           |
| 25-29                                                     | 111 (2.2%)                |
| 30-39                                                     | 573 (11.6%)               |
| 40-49                                                     | 1260 (25.5%)              |
| 50-59                                                     | 1496 (30.2%)              |
| 60-69                                                     | 1370 (27.7%)              |
| Missing                                                   | 138 (2.8%)                |
| <b>Sex</b>                                                |                           |
| Female                                                    | 4196 (84.8%)              |
| Male                                                      | 609 (12.3%)               |
| Missing                                                   | 143 (2.9%)                |
| <b>Gender</b>                                             |                           |
| Woman                                                     | 4159 (84.1%)              |
| Man                                                       | 597 (12.1%)               |
| Non-Binary, GenderQueer, Agender, Two-spirit,<br>or other | 52 (1.1%)                 |
| Missing                                                   | 140 (2.8%)                |
| <b>Indigenous</b>                                         |                           |
| Indigenous                                                | 127 (2.6%)                |
| Not Indigenous                                            | 4467 (90.3%)              |
| Prefer not to answer                                      | 34 (0.7%)                 |
| Missing                                                   | 320 (6.5%)                |
| <b>Asian<sup>1</sup></b>                                  |                           |
| No                                                        | 4563 (92.2%)              |
| Yes                                                       | 360 (7.3%)                |
| Missing                                                   | 25 (0.5%)                 |
| <b>Latin American</b>                                     |                           |
| Latin American                                            | 65 (1.3%)                 |
| Not                                                       | 4858 (98.2%)              |
| Missing                                                   | 25 (0.5%)                 |
| <b>South Asian<sup>2</sup></b>                            |                           |
| No                                                        | 4826 (97.5%)              |

|                                      |               |
|--------------------------------------|---------------|
| Yes                                  | 97 (2.0%)     |
| Missing                              | 25 (0.5%)     |
| <b>Black</b>                         |               |
| No                                   | 4895 (98.9%)  |
| Yes                                  | 28 (0.6%)     |
| Missing                              | 25 (0.5%)     |
| <b>White</b>                         |               |
| Yes                                  | 4089 (82.6%)  |
| No                                   | 834 (16.9%)   |
| Missing                              | 25 (0.5%)     |
| <b>Education</b>                     |               |
| More than High School                | 4148 (83.8%)  |
| High School or less                  | 655 (13.2%)   |
| Missing                              | 145 (2.9%)    |
| <b>Essential worker</b>              |               |
| No                                   | 3302 (66.7%)  |
| Yes, health worker                   | 594 (12.0%)   |
| Yes, other essential worker          | 910 (18.4%)   |
| Missing                              | 142 (2.9%)    |
| <b>Number of Adults in Household</b> |               |
| One                                  | 1151 (23.3%)  |
| Two                                  | 2598 (52.5%)  |
| Three or more                        | 1,050 (21.2%) |
| Missing                              | 149 (3.0%)    |
| <b>Children &lt; 5</b>               |               |
| None                                 | 4349 (87.9%)  |
| One                                  | 273 (5.5%)    |
| Two or more                          | 83 (1.7%)     |
| Missing                              | 243 (4.9%)    |
| <b>Children 5-17</b>                 |               |
| None                                 | 3242 (65.5%)  |
| One                                  | 731 (14.8%)   |
| Two or more                          | 760 (15.4%)   |
| Missing                              | 215 (4.3%)    |
| <b>Chronic Health Conditions</b>     |               |
| None                                 | 2302 (46.5%)  |

|                                                            |                    |
|------------------------------------------------------------|--------------------|
| One or more                                                | 2490 (50.3%)       |
| Missing                                                    | 156 (3.2%)         |
| <b>Do you think you had COVID-19</b>                       |                    |
| No                                                         | 4290 (86.7%)       |
| Yes                                                        | 534 (10.8%)        |
| Missing                                                    | 124 (2.5%)         |
| <b>WHO scale: Lack of Confidence in Vaccines</b>           |                    |
| Mean (SD)                                                  | 1.3 ( $\pm 0.6$ )  |
| Missing                                                    | 170 (3.4%)         |
| <b>WHO scale: Vaccine Risks</b>                            |                    |
| Mean (SD)                                                  | 3.0 ( $\pm 1.1$ )  |
| Missing                                                    | 173 (3.5%)         |
| <b>Attitudes to COVID-19 Vaccine</b>                       |                    |
| Mean (SD)                                                  | 34.6 ( $\pm 5.8$ ) |
| Missing                                                    | 609 (12.3%)        |
| <b>Perceived Behavioural Control</b>                       |                    |
| Mean (SD)                                                  | 16.0 ( $\pm 2.6$ ) |
| Missing                                                    | 509 (10.3%)        |
| <b>Direct Social Norms</b>                                 |                    |
| Mean (SD)                                                  | 14.8 ( $\pm 3.3$ ) |
| Missing                                                    | 586 (11.8%)        |
| <b>Indirect Social Norms: Family Doctor/PHCP</b>           |                    |
| Mean (SD)                                                  | 6.0 ( $\pm 3.6$ )  |
| Missing                                                    | 563 (11.4%)        |
| <b>Indirect Social Norms: BC Provincial Health Officer</b> |                    |
| Mean (SD)                                                  | 6.7 ( $\pm 3.6$ )  |
| Missing                                                    | 562 (11.4%)        |
| <b>Indirect Social Norms: Coworkers</b>                    |                    |
| Mean (SD)                                                  | 4.4 ( $\pm 3.5$ )  |
| Missing                                                    | 1797 (36.3%)       |
| <b>Indirect Social Norms: Employer</b>                     |                    |
| Mean (SD)                                                  | 5.2 ( $\pm 3.4$ )  |
| Missing                                                    | 1777 (35.9%)       |
| <b>Indirect Social Norms: Educational Institution</b>      |                    |
| Mean (SD)                                                  | 4.7 ( $\pm 3.4$ )  |

|                                       |                    |
|---------------------------------------|--------------------|
| Missing                               | 2899 (58.6%)       |
| <b>Indirect Social Norms: Friends</b> |                    |
| Mean (SD)                             | 4.1 ( $\pm$ 3.3)   |
| Missing                               | 556 (11.2%)        |
| <b>Indirect Social Norms: Family</b>  |                    |
| Mean (SD)                             | 5.5 ( $\pm$ 3.7)   |
| Missing                               | 528 (10.7%)        |
| <b>Indirect Social Norms: Total</b>   |                    |
| Mean (SD)                             | 22.4 ( $\pm$ 11.8) |
| Missing                               | 672 (13.6%)        |

---

<sup>1</sup> Asian: Chinese, Korean, Japanese, Filipino, Laotian, Cambodian, Vietnamese, etc.

<sup>2</sup> South Asian: Indian, Pakistani, Bangladeshi, Sri Lankan, Bhutanese, Nepalese, etc.

**Table 2:** Bivariable comparison and multivariable model for demographic factors associated with intention to receive COVID-19 vaccine (N=4787)

|                                                           | Likely to receive COVID-19 vaccine –<br>Bivariable comparisons* |                  |             |           | Likely to receive COVID-19 vaccine -<br>Multivariable model |             |           |
|-----------------------------------------------------------|-----------------------------------------------------------------|------------------|-------------|-----------|-------------------------------------------------------------|-------------|-----------|
|                                                           | % (95%CI)*                                                      | OR               | CI          | P-value** | OR                                                          | CI          | P-value** |
| <b>Age</b>                                                |                                                                 |                  |             |           |                                                             |             |           |
| 60-69                                                     | 84.2 (82.1 - 86.1)                                              | <i>reference</i> |             |           | <i>reference</i>                                            |             |           |
| 25-29                                                     | 85.6 (77.6 - 91.0)                                              | 1.12             | 0.64 - 1.95 | 0.7       | 1.42                                                        | 0.77 - 2.64 | 0.26      |
| 30-39                                                     | 75.5 (71.7 - 79.0)                                              | 0.58             | 0.45 - 0.74 | <0.0001   | 0.64                                                        | 0.49 - 0.83 | 0.0008    |
| 40-49                                                     | 78.8 (76.4 - 81.1)                                              | 0.7              | 0.57 - 0.86 | 0.0006    | 0.78                                                        | 0.62 - 0.97 | 0.02      |
| 50-59                                                     | 77.8 (75.6 - 79.9)                                              | 0.66             | 0.54 - 0.80 | <0.0001   | 0.67                                                        | 0.55 - 0.82 | 0.0001    |
| <b>Sex</b>                                                |                                                                 |                  |             |           |                                                             |             |           |
| Male                                                      | 84.6 (81.4 - 87.3)                                              | <i>reference</i> |             |           | <i>reference</i>                                            |             |           |
| Female                                                    | 79.2 (77.9 - 80.4)                                              | 0.7              | 0.55 - 0.88 | 0.003     | 0.7                                                         | 0.55 - 0.89 | 0.004     |
| Missing                                                   |                                                                 |                  |             |           |                                                             |             |           |
| <b>Gender</b>                                             |                                                                 |                  |             |           |                                                             |             |           |
| Woman                                                     | 79.0 (77.7 - 80.3)                                              | <i>reference</i> |             |           |                                                             |             |           |
| Man                                                       | 84.7 (81.5 - 87.4)                                              | 1.47             | 1.16 - 1.87 | 0.002     |                                                             |             |           |
| Non-Binary, GenderQueer,<br>Agender, Two-spirit, or other | 92.0 (80.3 - 97.0)                                              | 3.04             | 1.08 - 8.55 | 0.04      |                                                             |             |           |
| <b>Indigenous</b>                                         |                                                                 |                  |             |           |                                                             |             |           |
| Not Indigenous                                            | 80.5 (79.2 - 81.6)                                              | <i>reference</i> |             |           | <i>reference</i>                                            |             |           |
| Indigenous                                                | 66.5 (57.5 - 74.4)                                              | 0.48             | 0.32 - 0.71 | 0.0002    | 0.58                                                        | 0.38 - 0.87 | 0.009     |
| <b>Asian</b>                                              |                                                                 |                  |             |           |                                                             |             |           |
| No                                                        | 80.1 (78.8 - 81.3)                                              | <i>reference</i> |             |           |                                                             |             |           |
| Yes                                                       | 76.7 (71.9 - 80.9)                                              | 0.82             | 0.63 - 1.07 | 0.14      |                                                             |             |           |
| <b>South Asian</b>                                        |                                                                 |                  |             |           |                                                             |             |           |
| No                                                        | 80.1 (78.9 - 81.2)                                              | <i>reference</i> |             |           | <i>reference</i>                                            |             |           |
| Yes                                                       | 66.5 (56.2 - 75.5)                                              | 0.49             | 0.32 - 0.77 | 0.002     | 0.65                                                        | 0.39 - 1.07 | 0.09      |
| <b>Latin American</b>                                     |                                                                 |                  |             |           |                                                             |             |           |
| No                                                        | 79.9 (78.7 - 81.0)                                              | <i>reference</i> |             |           |                                                             |             |           |
| Yes                                                       | 75.3 (63.1 - 84.5)                                              | 0.77             | 0.43 - 1.37 | 0.37      |                                                             |             |           |
| <b>Black</b>                                              |                                                                 |                  |             |           |                                                             |             |           |



|                                      |                    |           |             |          |  |           |             |         |
|--------------------------------------|--------------------|-----------|-------------|----------|--|-----------|-------------|---------|
| No                                   | 79.9 (78.7 - 81.0) | reference |             |          |  |           |             |         |
| Yes                                  | 67.7 (48.1 - 82.6) | 0.53      | 0.23 - 1.20 | 0.13     |  |           |             |         |
| <b>White</b>                         |                    |           |             |          |  |           |             |         |
| Yes                                  | 80.8 (79.6 - 82.0) | reference |             |          |  | reference |             |         |
| No                                   | 73.8 (70.3 - 77.0) | 0.67      | 0.55 - 0.81 | < 0.0001 |  | 0.76      | 0.61 - 0.95 | 0.01    |
| <b>Education</b>                     |                    |           |             |          |  |           |             |         |
| More than High School                | 80.8 (79.6 - 82.0) | reference |             |          |  | reference |             |         |
| High School or less                  | 73.2 (69.6 - 76.6) | 0.65      | 0.53 - 0.79 | < 0.0001 |  | 0.62      | 0.51 - 0.77 | <0.0001 |
| <b>Essential worker</b>              |                    |           |             |          |  |           |             |         |
| No                                   | 80.9 (79.5 - 82.3) | reference |             |          |  | reference |             |         |
| Yes, health worker                   | 81.8 (78.5 - 84.8) | 1.06      | 0.84 - 1.34 | 0.61     |  | 1.1       | 0.86 - 1.40 | 0.45    |
| Yes, other essential worker          | 74.5 (71.5 - 77.3) | 0.69      | 0.58 - 0.82 | <0.0001  |  | 0.72      | 0.60 - 0.87 | 0.001   |
| <b>Chronic Health Conditions</b>     |                    |           |             |          |  |           |             |         |
| No chronic conditions                | 78.6 (76.9 - 80.3) | reference |             |          |  | reference |             |         |
| Any chronic condition                | 80.9 (79.3 - 82.5) | 1.15      | 1.00 - 1.33 | 0.05     |  | 1.14      | 0.98 - 1.32 | 0.10    |
| <b>Number of Adults in Household</b> |                    |           |             |          |  |           |             |         |
| One                                  | 78.4 (75.9 - 80.8) | reference |             |          |  |           |             |         |
| Two                                  | 81.3 (79.7 - 82.8) | 1.2       | 1.00 - 1.43 | 0.05     |  |           |             |         |
| Three or more                        | 77.8 (75.1 - 80.3) | 0.96      | 0.78 - 1.19 | 0.72     |  |           |             |         |
| <b>Children &lt; 5</b>               |                    |           |             |          |  |           |             |         |
| None                                 | 80.1 (78.9 - 81.3) | reference |             |          |  |           |             |         |
| One                                  | 77.2 (66.7 - 85.1) | 0.87      | 0.64 - 1.18 | 0.36     |  |           |             |         |
| Two or more                          | 77.8 (72.3 - 82.4) | 0.84      | 0.49 - 1.43 | 0.52     |  |           |             |         |
| <b>Children 5-17</b>                 |                    |           |             |          |  |           |             |         |
| None                                 | 80.3 (78.9 - 81.7) | reference |             |          |  |           |             |         |
| One                                  | 78.6 (75.4 - 81.5) | 0.9       | 0.74 - 1.11 | 0.32     |  |           |             |         |
| Two or more                          | 79.6 (76.5 - 82.4) | 0.96      | 0.78 - 1.17 | 0.67     |  |           |             |         |
| <b>Do you think you had COVID-19</b> |                    |           |             |          |  |           |             |         |
| No                                   | 80.3 (79.0 - 81.5) | reference |             |          |  | reference |             |         |
| Yes                                  | 76.2 (72.3 - 79.7) | 0.79      | 0.63 - 0.98 | 0.03     |  | 0.76      | 0.61 - 0.96 | 0.02    |

\* Estimated conditional proportion: effects models  
\*\* P-values from Wald tests against reference category

**Table 3: Results of psychological construct scales**

| <b>Attitude or norm</b>                                                                                                 | <b>Mean score (SD)</b> | <b>Cronbach's Alpha</b> |
|-------------------------------------------------------------------------------------------------------------------------|------------------------|-------------------------|
| <b>Attitudes towards a COVID-19 vaccine (n= 4,205)</b>                                                                  |                        |                         |
| A COVID-19 vaccine would be beneficial                                                                                  | 4.6 (0.8)              | 0.91                    |
| A COVID-19 vaccine would be beneficial for children                                                                     | 4.5 (0.9)              |                         |
| A COVID-19 vaccine would be beneficial for individuals 60-years and older                                               | 4.7 (0.8)              |                         |
| COVID-19 is a serious illness                                                                                           | 4.7 (0.8)              |                         |
| A COVID-19 vaccine would be beneficial for the health of my community                                                   | 4.7 (0.8)              |                         |
| A COVID-19 vaccine would be safe                                                                                        | 3.9 (0.9)              |                         |
| A COVID-19 vaccine would be effecting in presenting COVID-19                                                            | 4.1 (0.9)              |                         |
| A COVID-19 vaccine should be mandatory                                                                                  | 3.5 (1.3)              |                         |
| Overall                                                                                                                 | 34.6 (5.8)             |                         |
| <b>Direct Social norms (n= 4,224)</b>                                                                                   |                        |                         |
| Most people who are important to me would think that I should receive the COVID-19 vaccine                              | 4.2 (1.1)              | 0.69                    |
| People who are important to me would expect me to receive the COVID-19 vaccine                                          | 4.1 (1.1)              |                         |
| I would feel under social pressure to receive a COVID-19 vaccine                                                        | 3.1 (1.3)              |                         |
| Everyone I know would get the COVID-19 vaccine                                                                          | 3.4 (1.1)              |                         |
| Overall                                                                                                                 | 14.8 (3.3)             |                         |
| <b>Indirect Social norms (n= 4,141)</b>                                                                                 |                        |                         |
| My family physician (or other primary Health Care Provider) would approve/disapprove of me receiving a COVID-19 vaccine | 1.4 (0.8)              |                         |
| What my family physician (or other primary Health care Provider) thinks is important to me                              | 4.2 (0.8)              |                         |
| The BC Public Health Officer would approve/disapprove of me receiving the COVID-19 vaccine                              | 1.5 (0.7)              |                         |
| What the BC Public Health Officer recommends is important to follow                                                     | 4.3 (0.8)              |                         |
| My coworkers would approve/disapprove of me receiving the COVID-19 vaccine                                              | 1.2 (0.9)              |                         |
| What my coworkers think is important to me                                                                              | 3.4 (1.0)              |                         |
| My employer/work institution would approve/disapprove of me receiving the COVID-19 vaccine                              | 1.3 (0.8)              |                         |
| What my employer/work institution thinks is important to me                                                             | 3.6 (0.9)              |                         |

|                                                                                                                                                                                        |              |      |
|----------------------------------------------------------------------------------------------------------------------------------------------------------------------------------------|--------------|------|
| The educational institution (elementary/high school/college/university) that I or my children attend/are associated with would approve/disapprove of me receiving the COVID-19 vaccine | 1.3 (0.8)    |      |
| What my school/children's school thinks is important to me                                                                                                                             | 3.5 (0.9)    |      |
| My friends would approve/disapprove of me receiving the COVID-19 vaccine                                                                                                               | 1.1 (0.8)    |      |
| What my friends think is important to me                                                                                                                                               | 3.6 (0.8)    |      |
| My family would approve/disapprove of me receiving the COVID-19 vaccine                                                                                                                | 1.3 (0.8)    |      |
| What my family thinks is important to me                                                                                                                                               | 4.2 (0.8)    |      |
| Overall                                                                                                                                                                                | 22.4 (11.8)* | 0.89 |
| <b>Perceived Behavioural Controls (n= 4,300)</b>                                                                                                                                       |              |      |
| It would be difficult to receive the COVID-19 vaccine                                                                                                                                  | 3.9 (1.0)    |      |
| I could easily receive a COVID-19 vaccine if I wanted to                                                                                                                               | 4.0 (0.9)    |      |
| It would be completely up to me whether I received the COVID-19 vaccine                                                                                                                | 3.9 (1.0)    |      |
| How much control do you feel you would have over whether you receive a COVID-19 vaccine?                                                                                               | 4.2 (1.0)    |      |
| Overall                                                                                                                                                                                | 16.1 (2.6)   | 0.62 |

\*Does not include items for: coworkers, employers, or education, due to missing data

261  
262  
263

**Table 4:** Bivariable comparison and multivariable model of VHS and TPB and intention to receive COVID-19 vaccine (N=4787)

|                                                  | Likely to receive COVID-19 vaccine –<br>Bivariable comparisons |                  |      |             |           | Likely to receive COVID-19 vaccine -<br>Multivariable model |             |           |
|--------------------------------------------------|----------------------------------------------------------------|------------------|------|-------------|-----------|-------------------------------------------------------------|-------------|-----------|
|                                                  | No*<br>N = 967                                                 | Yes*<br>N = 3820 | OR   | CI          | P-value** | OR                                                          | CI          | P-value** |
| <b>WHO scale: Lack of Confidence in Vaccines</b> |                                                                |                  |      |             |           |                                                             |             |           |
| Mean (SD)                                        | 1.6 (±0.9)                                                     | 1.2 (±0.5)       | 0.35 | 0.31 - 0.40 | < 0.0001  | 0.66                                                        | 0.57 - 0.75 | < 0.0001  |
| Missing                                          | 7 (0.7%)                                                       | 7 (0.2%)         |      |             |           |                                                             |             |           |
| <b>WHO scale: Vaccine Risks</b>                  |                                                                |                  |      |             |           |                                                             |             |           |
| Mean (SD)                                        | 3.5 (±1.0)                                                     | 2.9 (±1.0)       | 0.53 | 0.49 - 0.57 | < 0.0001  | 0.72                                                        | 0.66 - 0.80 | < 0.0001  |
| Missing                                          | 7 (0.7%)                                                       | 10 (0.3%)        |      |             |           |                                                             |             |           |
| <b>Attitudes to COVID-19 Vaccine</b>             |                                                                |                  |      |             |           |                                                             |             |           |
| Mean (SD)                                        | 30.3 (±6.9)                                                    | 35.7 (±4.9)      | 1.15 | 1.14 - 1.17 | < 0.0001  | 1.06                                                        | 1.04 - 1.08 | < 0.0001  |
| Missing                                          | 108 (11.2%)                                                    | 345 (9.0%)       |      |             |           |                                                             |             |           |
| <b>Perceived Behavioural Control</b>             |                                                                |                  |      |             |           |                                                             |             |           |
| Mean (SD)                                        | 15.6 (±2.6)                                                    | 16.2 (±2.6)      | 1.08 | 1.05 - 1.12 | < 0.0001  | 1.00                                                        | 0.97 - 1.04 | 0.92      |
| Missing                                          | 77 (8.0%)                                                      | 277 (7.3%)       |      |             |           |                                                             |             |           |
| <b>Direct Social Norms</b>                       |                                                                |                  |      |             |           |                                                             |             |           |
| Mean (SD)                                        | 12.7 (±3.7)                                                    | 15.3 (±3.0)      | 1.26 | 1.23 - 1.29 | < 0.0001  | 1.06                                                        | 1.03 - 1.08 | 0.0004    |
| Missing                                          | 99 (10.2%)                                                     | 332 (8.7%)       |      |             |           |                                                             |             |           |
| <b>Indirect Social Norms: Family Doctor/PHCP</b> |                                                                |                  |      |             |           |                                                             |             |           |
| Mean (SD)                                        | 3.7 (±3.8)                                                     | 6.6 (±3.3)       | 1.26 | 1.23 - 1.30 | < 0.0001  | 1.04                                                        | 1.00 - 1.08 | 0.03      |
| Missing                                          | 107 (11.1%)                                                    | 300 (7.9%)       |      |             |           |                                                             |             |           |

**Indirect Social Norms: BC Provincial Health Officer**

|           |             |            |      |             |          |      |             |      |
|-----------|-------------|------------|------|-------------|----------|------|-------------|------|
| Mean (SD) | 4.3 (±3.8)  | 7.2 (±3.3) | 1.24 | 1.22 - 1.27 | < 0.0001 | 1.04 | 1.01 - 1.08 | 0.01 |
| Missing   | 110 (11.4%) | 296 (7.7%) |      |             |          |      |             |      |

**Indirect Social Norms: Coworkers**

|           |             |               |     |             |          |  |  |  |
|-----------|-------------|---------------|-----|-------------|----------|--|--|--|
| Mean (SD) | 2.7 (±3.3)  | 4.8 (±3.4)    | 1.2 | 1.17 - 1.24 | < 0.0001 |  |  |  |
| Missing   | 339 (35.1%) | 1,302 (34.1%) |     |             |          |  |  |  |

**Indirect Social Norms: Employer**

|           |             |               |     |             |          |  |  |  |
|-----------|-------------|---------------|-----|-------------|----------|--|--|--|
| Mean (SD) | 3.5 (±3.5)  | 5.6 (±3.3)    | 1.2 | 1.18 - 1.24 | < 0.0001 |  |  |  |
| Missing   | 342 (35.4%) | 1,279 (33.5%) |     |             |          |  |  |  |

**Indirect Social Norms: Educational Institution**

|           |             |               |      |             |          |  |  |  |
|-----------|-------------|---------------|------|-------------|----------|--|--|--|
| Mean (SD) | 3.0 (±3.3)  | 5.2 (±3.3)    | 1.22 | 1.18 - 1.26 | < 0.0001 |  |  |  |
| Missing   | 551 (57.0%) | 2,190 (57.3%) |      |             |          |  |  |  |

**Indirect Social Norms: Friends**

|           |             |            |      |             |          |      |             |     |
|-----------|-------------|------------|------|-------------|----------|------|-------------|-----|
| Mean (SD) | 2.0 (±3.2)  | 4.6 (±3.1) | 1.32 | 1.28 - 1.36 | < 0.0001 | 1.04 | 0.99 - 1.08 | 0.1 |
| Missing   | 102 (10.5%) | 299 (7.8%) |      |             |          |      |             |     |

**Indirect Social Norms: Family**

|           |            |            |      |             |          |      |             |          |
|-----------|------------|------------|------|-------------|----------|------|-------------|----------|
| Mean (SD) | 2.9 (±3.9) | 6.2 (±3.3) | 1.31 | 1.27 - 1.34 | < 0.0001 | 1.09 | 1.06 - 1.13 | < 0.0001 |
| Missing   | 95 (9.8%)  | 278 (7.3%) |      |             |          |      |             |          |

**Indirect Social Norms: Total**

|           |              |              |     |             |          |  |  |  |
|-----------|--------------|--------------|-----|-------------|----------|--|--|--|
| Mean (SD) | 13.0 (±12.6) | 24.8 (±10.4) | 1.1 | 1.09 - 1.10 | < 0.0001 |  |  |  |
| Missing   | 125 (12.9%)  | 390 (10.2%)  |     |             |          |  |  |  |

\* Raw means and SD

\*\* P-values from Wald tests

265  
266  
267

**Table 5:** Comparison of psychological constructs (WHO VHS scale and TPB framework) by sex

|                                                            | <b>Female<br/>N = 4178</b> | <b>Male<br/>N = 605</b> |
|------------------------------------------------------------|----------------------------|-------------------------|
| <b>WHO scale: Lack of Confidence in Vaccines</b>           |                            |                         |
| Mean (SD)                                                  | 1.3 ( $\pm 0.6$ )          | 1.3 ( $\pm 0.6$ )       |
| Missing                                                    | 12 (0.3%)                  | 2 (0.3%)                |
| <b>WHO scale: Vaccine Risks</b>                            |                            |                         |
| Mean (SD)                                                  | 3.1 ( $\pm 1.1$ )          | 2.7 ( $\pm 1.1$ )       |
| Missing                                                    | 15 (0.4%)                  | 2 (0.3%)                |
| <b>Attitudes to COVID-19 Vaccine</b>                       |                            |                         |
| Mean (SD)                                                  | 34.5 ( $\pm 5.8$ )         | 35.4 ( $\pm 5.7$ )      |
| Missing                                                    | 403 (9.6%)                 | 50 (8.3%)               |
| <b>Perceived Behavioural Control</b>                       |                            |                         |
| Mean (SD)                                                  | 16.0 ( $\pm 2.6$ )         | 16.2 ( $\pm 2.6$ )      |
| Missing                                                    | 314 (7.5%)                 | 40 (6.6%)               |
| <b>Direct Social Norms</b>                                 |                            |                         |
| Mean (SD)                                                  | 14.7 ( $\pm 3.3$ )         | 15.5 ( $\pm 3.0$ )      |
| Missing                                                    | 383 (9.2%)                 | 48 (7.9%)               |
| <b>Indirect Social Norms: Family Doctor/PHCP</b>           |                            |                         |
| Mean (SD)                                                  | 5.9 ( $\pm 3.6$ )          | 6.8 ( $\pm 3.5$ )       |
| Missing                                                    | 365 (8.7%)                 | 42 (6.9%)               |
| <b>Indirect Social Norms: BC Provincial Health Officer</b> |                            |                         |
| Mean (SD)                                                  | 6.6 ( $\pm 3.6$ )          | 7.1 ( $\pm 3.3$ )       |
| Missing                                                    | 363 (8.7%)                 | 43 (7.1%)               |
| <b>Indirect Social Norms: Coworkers</b>                    |                            |                         |
| Mean (SD)                                                  | 4.3 ( $\pm 3.5$ )          | 4.9 ( $\pm 3.5$ )       |
| Missing                                                    | 1461 (35.0%)               | 180 (29.8%)             |
| <b>Indirect Social Norms: Employer</b>                     |                            |                         |
| Mean (SD)                                                  | 5.1 ( $\pm 3.4$ )          | 5.5 ( $\pm 3.2$ )       |
| Missing                                                    | 1441 (34.5%)               | 180 (29.8%)             |
| <b>Indirect Social Norms: Educational Institution</b>      |                            |                         |
| Mean (SD)                                                  | 4.6 ( $\pm 3.4$ )          | 5.5 ( $\pm 3.4$ )       |
| Missing                                                    | 2416 (57.8%)               | 323 (53.4%)             |

**Indirect Social Norms: Friends**

|           |                   |                   |
|-----------|-------------------|-------------------|
| Mean (SD) | 4.0 ( $\pm 3.3$ ) | 4.7 ( $\pm 3.0$ ) |
| Missing   | 357 (8.5%)        | 44 (7.3%)         |

**Indirect Social Norms: Family**

|           |                   |                   |
|-----------|-------------------|-------------------|
| Mean (SD) | 5.4 ( $\pm 3.7$ ) | 6.3 ( $\pm 3.5$ ) |
| Missing   | 334 (8.0%)        | 39 (6.4%)         |

**Indirect Social Norms: Total**

|           |                     |                     |
|-----------|---------------------|---------------------|
| Mean (SD) | 22.1 ( $\pm 11.9$ ) | 24.8 ( $\pm 10.9$ ) |
| Missing   | 459 (11.0%)         | 56 (9.3%)           |

## REFERENCES

- 1) van Riel D, de Wit E. Next-generation vaccine platforms for COVID-19. *Nat Mater* [Internet]. 2020 Jul;19(8):810-2. Available from: <https://www.nature.com/articles/s41563-020-0746-0>
- 2) Frank K, Arim R. Statistics Canada. Canadians' willingness to get a COVID-19 vaccine: Group differences and reasons for vaccine hesitancy [Internet]. Ottawa: Statistics Canada Catalogue no. 45280001. 2020 Aug 25 [cited 2020 Oct 22]. Available from: <https://www150.statcan.gc.ca/n1/pub/45-28-0001/2020001/article/00073-eng.htm>
- 3) Polack F, Thomas S, Kitchin N, Absalon J, Gurtman A, Lockhart S, et al. Safety and Efficacy of the BNT162b2 mRNA Covid-19 Vaccine. *New England Journal of Medicine* [Internet]. 2020;. Available from: <http://dx.doi.org/10.1056/NEJMoa2034577>
- 4) Moderna. Moderna's COVID-19 Vaccine Candidate Meets its Primary Efficacy Endpoint in the First Interim Analysis of the Phase 3 COVE Study [Press Release]. 2020 Nov 16 [cited 2020 Nov 17]. Available from: <https://investors.modernatx.com/news-releases/news-release-details/modernas-covid-19-vaccine-candidate-meets-its-primary-efficacy>
- 5) World Health Organization. WHO SAGE values framework for the allocation and prioritization of COVID-19 vaccination [Internet]. 2020 Sep 14 [cited 2020 Oct 22]. Available from: <https://www.who.int/publications/i/item/who-sage-values-framework-for-the-allocation-and-prioritization-of-covid-19-vaccination>
- 6) Bell BP, Romero JR, Lee GM. Scientific and ethical principles underlying recommendations from the advisory committee on immunization practices for COVID-19 vaccination implementation. *JAMA* [Internet]. 2020 Oct 22 [cited 2020 Oct 26]; Available from: <https://jamanetwork.com/journals/jama/fullarticle/2772326>
- 7) NACI. Public Health Agency of Canada. COVID-19: Preliminary guidance on key populations for early immunization - Canada.ca [Internet]. Canada.ca. 2020 [cited 2020 Nov 10]. Available from: <https://www.canada.ca/en/public-health/services/immunization/national-advisory-committee-on-immunization-naci/guidance-key-populations-early-covid-19-immunization.html>
- 8) Shapiro GK, Tatar O, Dube E, Amsel R, Knauper B, Naz A, et al. The vaccine hesitancy scale: Psychometric properties and validation. *Vaccine* [Internet]. 2018;36(5):660–7. Available from: <http://dx.doi.org/10.1016/j.vaccine.2017.12.043>
- 9) World Health Organization. Report of the SAGE working group on vaccine hesitancy [Internet]. 2014 Oct 1 [cited 2020 Oct 22]. Available from: [https://www.who.int/immunization/sage/meetings/2014/october/1\\_Report\\_WORKING\\_GROUP\\_vaccine\\_hesitancy\\_final.pdf](https://www.who.int/immunization/sage/meetings/2014/october/1_Report_WORKING_GROUP_vaccine_hesitancy_final.pdf)



- 10) Kerrigan AR, Aitnouri I, Mar J, Altman W. What barriers exist in the minds of vaccine-hesitant parents, and how can we address them? *Fam Med* [Internet]. 2020;52(9):626–30. Available from: <http://dx.doi.org/10.22454/fammed.2020.432940>
- 11) Suppli CH, Hansen ND, Rasmussen M, Valentiner-Branth P, Krause TG, Molbak K. Decline in HPV-vaccination uptake in Denmark - the association between HPV-related media coverage and HPV-vaccination. *BMC Public Health* [Internet]. 2018;18(1):1360. Available from: <http://dx.doi.org/10.1186/s12889-018-6268-x>
- 12) Dubé E, Vivion M, MacDonald NE. Vaccine hesitancy, vaccine refusal and the anti-vaccine movement: influence, impact and implications. *Expert Rev Vaccines* [Internet]. 2015;14(1):99–117. Available from: <http://dx.doi.org/10.1586/14760584.2015.964212>
- 13) Smith MJ. Promoting vaccine confidence. *Infect Dis Clin North Am* [Internet]. 2015;29(4):759–69. Available from: <http://dx.doi.org/10.1016/j.idc.2015.07.004>
- 14) Statistics Canada. Population and Dwelling Count Highlight Tables, 2016 Census [Internet]. 2018 Feb 7 [cited 2021 Feb 16]. Available from: <https://www12.statcan.gc.ca/census-recensement/2016/dp-pd/hlt-fst/pd-pl/Table.cfm?Lang=Eng&T=703&SR=1&S=87&O=A&RPP=25#details-panel2>
- 15) Province of British Columbia. COVID-19 Immunization Plan [Internet]. 2021 Jan 29 [cited 2021 Feb 16]. Available from: <https://www2.gov.bc.ca/gov/content/safety/emergency-preparedness-response-recovery/covid-19-provincial-support/vaccines#phases>
- 16) COVID-19 RESPPonSe Study – Women’s Health Research Institute [Internet]. 2020 [cited 2020 Oct 25]. Available from: <http://whri.org/covid-19-respponse-study/>
- 17) Ajzen I. The theory of planned behavior. *Organ Behav Hum Decis Process* [Internet]. 1991;50(2):179–211. Available from: [http://dx.doi.org/10.1016/0749-5978\(91\)90020-t](http://dx.doi.org/10.1016/0749-5978(91)90020-t)
- 18) Ogilvie GS, Smith LW, van Niekerk DJ, Khurshed F, Kraiden M, Saraiya M, et al. Women’s intentions to receive cervical cancer screening with primary human papillomavirus testing. *Int J Cancer* [Internet]. 2013;133(12):2934–43. Available from: <http://dx.doi.org/10.1002/ijc.28324>
- 19) Corace KM, Srigley JA, Hargadon DP, Yu D, MacDonald TK, Fabrigar LR, et al. Using behavior change frameworks to improve healthcare worker influenza vaccination rates: A systematic review. *Vaccine* [Internet]. 2016;34(28):3235–42. Available from: <http://dx.doi.org/10.1016/j.vaccine.2016.04.071>
- 20) Godin G, Vézina-Im L-A, Naccache H. Determinants of influenza vaccination among healthcare workers. *Infect Control Hosp Epidemiol* [Internet]. 2010;31(7):689–93. Available from: <http://dx.doi.org/10.1086/653614>

- 21) Ogilvie G, Anderson M, Marra F, McNeil S, Pielak K, Dawar M, McIvor M, Ehlen T, Dobson S, Money D, Patrick DM, Naus M. A population-based evaluation of a publicly funded, school-based HPV vaccine program in British Columbia, Canada: Parental factors associated with HPV vaccine receipt. PLoS Med [Internet]. 2010;7(5):e1000270. Available from: <http://dx.doi.org/10.1371/journal.pmed.1000270>
- 22) Ogilvie GS, Remple VP, Marra F, McNeil SA, Naus M, Pielak KL, Ehlen TG, Dobson SR, Money DM, Patrick DM. Parental intention to have daughters receive the human papillomavirus vaccine. CMAJ [Internet]. 2007;177(12):1506–12. Available from: <http://dx.doi.org/10.1503/cmaj.071022>
- 23) Harris PA, Taylor R, Thielke R, Payne J, Gonzalez N, Conde JG. Research electronic data capture (REDCap)--a metadata-driven methodology and workflow process for providing translational research informatics support. J Biomed Inform [Internet]. 2009 Apr;42(2):377–81. Available from: <http://dx.doi.org/10.1016/j.jbi.2008.08.010>
- 24) The American Association for Public Opinion Research. Final disposition of case codes and outcome rates for surveys. Rev ed. 9 [Internet]. 2016 [cited 2020 Oct 30]. Available from: [https://www.aapor.org/AAPOR\\_Main/media/publications/Standard-Definitions20169theditionfinal.pdf](https://www.aapor.org/AAPOR_Main/media/publications/Standard-Definitions20169theditionfinal.pdf)
- 25) Fine P, Eames K, Heymann DL. “Herd immunity”: a rough guide. Clin Infect Dis [Internet]. 2011;52(7):911–6. Available from: <http://dx.doi.org/10.1093/cid/cir007>
- 26) R Core Team. The R Project for Statistical Computing: v.4.0.2 [Internet]. 2020 [cited 2020 Nov 16]. Available from: <https://www.R-project.org/>
- 27) Frank K, Arim R. Statistics Canada. Canadians’ willingness to get a COVID-19 vaccine when one becomes available: What role does trust play? [Internet]. Ottawa: Statistics Canada Catalogue no. 45280001. 2020 Jul 7 [cited 2020 Oct 22]. Available from: <https://www150.statcan.gc.ca/n1/pub/45-28-0001/2020001/article/00043-eng.htm>
- 28) Angus Reid Institute. COVID-19: Three-in-five worry about side-effects of a vaccine; many plan to take a ‘wait and see’ approach [Internet]. 2020 Aug 4 [cited 2020 Nov 1]. Available from: <http://angusreid.org/coronavirus-vaccine/>
- 29) Szilagyi PG, Thomas K, Shah MD, Vizueta N, Cui Y, Vangala S, et al. National trends in the US public’s likelihood of getting a COVID-19 vaccine-April 1 to December 8, 2020. JAMA [Internet]. 2020 Dec 29 [cited 2021 Jan 6]. Available from: <http://dx.doi.org/10.1001/jama.2020.26419>
- 30) [Sherman SM, Smithe LE, Sim Julius, Amlôt R, Cutts Megan, Dasch H, et al. COVID-19 vaccination intention in the UK: results from the COVID-19 vaccination acceptability study \(CoVAccS\), a nationally representative cross-sectional survey. Hum Vaccin Immunother](#)

[\[Internet\]. 2020 Nov 26 \[cited 2021 Feb 11\]; Available from: <https://doi.org/10.1080/21645515.2020.1846397>](#)

- 31) Fisher KA, Bloomstone SJ, Walder J, Crawford S, Fouayzi H, Mazor KM. Attitudes toward a potential SARS-CoV-2 vaccine: A survey of U.S. adults. *Ann Intern Med* [Internet]. 2020; Available from: <http://dx.doi.org/10.7326/M20-3569>
- 32) McKie R. Covid-19: only half of Britons would definitely have vaccination. *The guardian* [Internet]. 2020 Aug 9 [cited 2020 Oct 30]; Available from: <http://www.theguardian.com/world/2020/aug/09/only-half-of-britons-would-definitely-have-covid-19-vaccination>
- 33) World Health Organization. Immunization Agenda 2030 [Internet]. 2020 Apr 2 [cited 2020 Nov 23]. Available from: [who.int/teams/immunization-vaccines-and-biologicals/strategies/ia2030](http://who.int/teams/immunization-vaccines-and-biologicals/strategies/ia2030)
- 34) Statistics Canada. Census Profile, 2016 Census: British Columbia and Canada [Internet]. Ottawa: Statistics Canada; 2016 [cited 2020 Nov 22]. Available from: <https://www12.statcan.gc.ca/census-recensement/2016/dp-pd/prof/details/page.cfm?Lang=E&Geo1=PR&Code1=59&Geo2=PR&Code2=01&SearchText=british%20columbia&SearchType=Begins&SearchPR=01&B1=All&TABID=1&type=0>
