## Abstract

34  
35

36 **Objective:** The success of any COVID-19 vaccine program ultimately depends on high vaccine  
37 uptake. This study determined overall intention to receive a COVID-19 vaccine and identified  
38 factors that predict intentions to be vaccinated against COVID-19 in Canada.

39

40 **Methods:** Individuals from research cohorts from the general population of British Columbia  
41 aged 25-69 were invited complete an online survey based on validated scales and theoretical  
42 frameworks to explore intention to receive a COVID-19 vaccine. Two multivariable logistic  
43 regression models were conducted to determine factors associated with intention to receive the  
44 COVID-19 vaccine.

45

46 **Results:** Of 4,528 respondents, 79.8% intended to receive a COVID-19 vaccine. In  
47 multivariable modeling, respondents who intended to receive the vaccine had higher vaccine  
48 attitudinal scores ( $p < 0.001$ ), reported greater influence of direct social norms ( $p = 0.001$ ), and  
49 indirect social norms, including their family physician ( $p = 0.024$ ), and Provincial Health Officer  
50 ( $p = 0.011$ ). Older individuals ( $>60$  years) were more likely to intend to receive the vaccine,  
51 while females (95%CI 0.57,0.93), those with less than high school education (95%CI 0.5,0.76),  
52 those who self-identified as non-white (95%CI 0.60,0.92), self-identified as Indigenous (95%CI  
53 0.36,0.84) and essential non-health care workers (95%CI 0.59,0.86) had lower adjusted odds of  
54 intending to receive a COVID-19 vaccine.

55

56 **Conclusions:** To optimize vaccine coverage, public health should focus on key messages  
57 around vaccine safety and benefit, and leverage trusted practitioners for messaging. As certain

58 key populations report a lower intention to vaccinate, there is a need for in-depth education and  
59 support for these communities to ensure optimal uptake.

60 **Keywords**

- 61 • COVID-19
- 62 • Vaccine hesitancy
- 63 • Vaccine confidence
- 64 • Vaccine
- 65 • Canada
- 66 • Public health

## 67 INTRODUCTION

68 The development of safe and effective COVID-19 vaccines is a critical step in ending the  
69 pandemic.<sup>1,2</sup> Vaccine programs have commenced, with multiple phase 3 vaccine trials  
70 suggesting very promising efficacy, and recently published data of the Pfizer vaccine showing  
71 95% protection against COVID-19.<sup>3,4</sup> Global health authorities including the World Health  
72 Organization (WHO)<sup>5</sup> and the American Committee on Immunization Practice<sup>6</sup> have provided  
73 guidance for vaccine roll-out globally with the acknowledgment that initial vaccine supply will be  
74 limited. In Canada, the National Advisory Committee on Immunization (NACI) has identified  
75 priority populations for initial vaccine roll-out, including populations at high risk for severe  
76 COVID-19 related illness; those most likely to transmit COVID-19 to those at high risk; those  
77 essential to maintaining the COVID-19 response; those who contribute to the maintenance of  
78 essential services; and those living or working in conditions that put them at higher risk for  
79 infection.<sup>7</sup>

80

81 Ultimately, the success of any COVID-19 vaccine program depends upon vaccine uptake in the  
82 population. Over the past decade there has been a significant rise in “vaccine hesitancy”, a  
83 complex concept defined as the refusal, reluctance, or delay in acceptance to vaccinate despite  
84 vaccine availability<sup>2,8,9</sup>, which has led to decreases in vaccine uptake.<sup>10,11,12,13</sup> Understanding the  
85 predictors and determinants influencing intentions to receive a COVID-19 vaccine in Canada  
86 are key to designing public health programming to optimize vaccination rates, including among  
87 priority populations, when vaccine is available broadly.<sup>6,7</sup> When evaluating vaccine intention,  
88 assessments should be based on validated theoretical frameworks in order to provide robust  
89 information for program planning. Using a survey based on the WHO Vaccine Hesitancy Scale  
90 (VHS) and grounded in the Theory of Planned Behaviour (TPB), the primary objective of this  
91 study was to determine the intention to receive a COVID-19 vaccine among people living in

92 British Columbia. The secondary objectives were to identify factors that predict intentions to be  
93 vaccinated, specifically in priority groups identified by NACI, in order to guide public health  
94 vaccination programs.

95

## 96 **METHODS**

97 The current study is part of a larger, ongoing investigation led by the Women's Health Research  
98 Institute evaluating the impacts of COVID-19 and public health controls on British Columbians.<sup>14</sup>

99

### 100 *Participants and recruitment*

101 Prospective participants were part of large research cohorts from the general population of  
102 British Columbia (BC) who had consented to be contacted for future research. Eligible  
103 individuals (aged 25-69; resident of BC) were sent an email invitation to participate (*Index*  
104 *Participants*) in an online survey. To increase diverse sex and gender representation,  
105 respondents were asked to provide the email address of an adult household member who  
106 identified as another gender to participate in the survey – these individuals were then invited to  
107 participate in the online survey (*Household Participants*). All prospective participants received  
108 up to three email reminders, and an opportunity to participate in a draw for a gift card.  
109 Participants could also opt-in to receive an at-home SARS-CoV-2 research antibody test (data  
110 collection ongoing and will be reported separately). Ethical approval was received from The  
111 University of British Columbia Research Ethics Board (H20-01421).

112

### 113 *Survey Design and Measures*

114 To determine the factors associated with intention to be vaccinated, existing items came from  
115 the validated WHO VHS<sup>9</sup> and new items were developed using TPB framework.<sup>15</sup> TPB is a  
116 psychological model of behavior change that has been used widely to predict and understand  
117 health-related behaviours and has been shown previously to accurately predict vaccine uptake  
118 in Canada.<sup>16,17,18,19,20</sup> TPB defines the most significant predictors of a health behaviour as  
119 attitudes, social norms (direct, indirect), and perceived behavioural controls.<sup>15</sup> For this survey,

120 items were developed from a detailed literature review and through elicitation surveys of experts  
121 to identify key factors expected to influence intention to receive a COVID-19 vaccine (Appendix  
122 A). The survey assessed vaccine attitudes (8 items), direct social norms (4 items), indirect  
123 social norms (14 items), and perceived behavioural controls (4 items) (Appendix B). Vaccine  
124 hesitancy was measured using the validated 9-item, 2-factor VHS initially developed by the  
125 WHO Sage Working Group on Vaccine Hesitancy<sup>8,9,12</sup>, and adapted for BC. The factors included  
126 in VHS are vaccine lack of confidence (7 items) and vaccine risk (2 items).<sup>8</sup> All items in TPB  
127 and VHS scales were measured on a 5-point Likert scale. The overall survey was assessed for  
128 face validity and comprehension, pilot tested, and the final version was implemented using  
129 REDCap (Research Electronic Data Capture).<sup>21</sup>

130 For each participant the following demographic characteristics were assessed: age, sex,  
131 gender, Indigenous ancestry, visible minority status, education, household composition, existing  
132 chronic health condition, self-reported history of COVID-19, and self-reported employment as an  
133 essential worker. Visible minority categories were based on the Statistics Canada 2016 census.  
134 The primary outcome was response to “*If a COVID-19 vaccine were to become available to the*  
135 *public, and recommended for you, how likely are you to receive it?*”

136

### 137 *Survey response rate*

138 Response rate was calculated according to the American Association for Public Opinion  
139 Research (AAPOR) guidelines for Internet Surveys of Specifically Named Persons.<sup>22</sup> Response  
140 rate is defined as the sum of complete (100% of applicable questions answered) and partial  
141 surveys (<100% of applicable questions answered), divided by the overall number of invitations  
142 distributed to eligible respondents. Participant disposition is defined as: respondents (number of  
143 complete and partial surveys), ineligible (those who did not meet the eligibility criteria), invitation  
144 returned undelivered (number of emails bounced back), explicit refusals (those who replied that

145 they did not want to participate), implicit refusals (those who visited the survey URL but failed to  
146 complete any survey items), and nothing ever returned (those who did not respond to the survey  
147 invites).<sup>22</sup> With a sample size of 4,500, we had 80% power to detect +/- 1.34% 95%CI around an  
148 estimated overall vaccine acceptance rate of 70%.<sup>23</sup> We plan to compare ages of responders  
149 and non-responders to determine representativeness of the study participants.

150

## 151 *Analyses*

152 Analyses were carried out in R v.4.0.2.<sup>24</sup> Mean values for TPB and VHS scales were  
153 calculated. Item reliability for TPB scales was assessed using Cronbach's  $\alpha$ , and if  $\alpha > 0.6$  (good  
154 agreement), scales were included in bivariable and multivariable analysis. For the primary  
155 outcome (intention to receive a COVID-19 vaccine) responses on the 5-point Likert scale were  
156 dichotomized, with those who responded *very* or *somewhat likely* coded as "intending to  
157 vaccinate" and those who responses *neutral*, *unlikely*, or *very unlikely* coded as "not intending to  
158 vaccinate". We investigated the relationship between intention to get a COVID-19 vaccine and  
159 demographic and vaccine specific variables using mixed-effects logistic regressions. To allow  
160 participants to select more than one visible minority category, visible minority variables were  
161 coded as those who indicated a particular minority status vs. those who did not, and used as  
162 separate variables in analyses. Intention to vaccinate was examined in priority groups identified  
163 by NACI, including older (>60), those with chronic health conditions, visible minorities,  
164 Indigenous participants, healthcare workers, and essential workers.<sup>7</sup> Two multivariable mixed-  
165 effects logistic regression models were conducted to explore factors associated with the  
166 dependent variable '*intention to receive a COVID-19 vaccine*'. One model examined  
167 demographic variables, and the other model included the VHS and TPB items. For both models,  
168 *a priori* predictors of vaccine intention which achieved a  $p < 0.1$  from bivariable analysis were  
169 included in multivariable models, and adjusted odds ratios were calculated to identify factors



170 associated with intention to receive the COVID-19 vaccine. Case-wise deletion was used to  
171 address missing data within each bivariable analysis. Multivariable analyses included only non-  
172 missing data. Clustering by household was accounted for in the mixed-effects models using a  
173 random effect for household ID. A descriptive analysis of male versus female respondents was  
174 completed for the WHO VHS scale and the TPB framework.

## 175 RESULTS

### 176 *Survey Respondents*

177 Between August 20 and September 27, 2020, 13,764 survey invites were distributed to  
178 prospective *Index Participants* and 4,292 responded to the survey (Figure 1). Of the 1291  
179 invites that were forwarded to prospective *Household Participants*, 656 responded. Overall,  
180 4,058 surveys were completed and 890 were partially completed by eligible participants, for a  
181 response rate of 32.9% (4,948/15,055) overall (including all who were *sent* the survey), and  
182 37.2% (4,948/13,299) (including only those who *received* the survey). We compared the ages  
183 of survey respondents and non-respondents (those who declined participation or did not  
184 respond) across five age strata (25-30; 30-40; 40-50; 50-60; 60-70). We found no significant  
185 differences between the ages of respondents and non-respondents, indicating  
186 representativeness of our sample based on age (data not shown).

187

### 188 *Demographics*

189 Survey respondents had a mean age of 51.8 (SD= 10.5) with a range from 25-69 years (Table  
190 1). The majority of participants self-reported being assigned female sex at birth (84.8%),  
191 identified as women (84.1%), white (82.6%), and had more than a high school education  
192 (83.8%). Fifty-two participants (1.1%) identified as non-binary, GenderQueer, Agender, Two-  
193 Spirit, or other gender identity. Visible minority responses were grouped into broader categories  
194 for analyses. Essential health care workers comprised 12.0% of respondents and essential non-  
195 healthcare workers comprised 18.4%. Survey respondents were from all five health authorities  
196 in BC.

197

### 198 *Intention to receive a COVID-19 vaccine*

199 Overall, 79.8% were 'somewhat or very likely' to receive a COVID-19 vaccine if it was available  
200 to the public and recommended for them, adjusted for household clustering (Table 2). Among  
201 essential health care workers, 81.8% indicated that they intend to receive a COVID-19 vaccine.  
202 In bivariable analyses, those who were older (>60 years), males, had chronic health conditions,  
203 were essential health care workers, had more than a high school education, or had two adults in  
204 the house were significantly more likely to intend to receive the COVID-19 vaccine ( $p \leq 0.05$ ).  
205 Individuals who were essential non-health care workers, identified as non-white, South Asian or  
206 of Indigenous ancestry were significantly less likely to intend to receive vaccination- ( $p \leq 0.05$ ).  
207 Given there were only 52 non-binary, GenderQueer, Agender, or Two-spirit respondents, sex,  
208 not gender, was used in the model. In multivariable modeling, individuals who were older (>60  
209 years) were more likely to intend to receive the COVID-19 vaccine (Table 2), while females  
210 (AOR 0.7; 95%CI 0.55, 0.89); those who had less than a high school education (AOR 0.62;  
211 95%CI 0.51, 0.77); those who self-identified as non-white (AOR 0.76; 95%CI 0.61, 0.95); those  
212 who self-identified as Indigenous (AOR 0.58; 95%CI 0.38, 0.87); those who were essential non-  
213 health care workers (AOR 0.72; 95%CI 0.6, 0.87); and those who thought they had COVID-19  
214 (AOR 0.76; 95% 0.61 – 0.96) had lower adjusted odds of intending to receive a COVID-19  
215 vaccine if it were publicly available and recommended for them.

216

### 217 *Vaccine Hesitancy Scale and Theory of Planned Behaviour*

218 All items in the TPB scale had good to strong agreement (Cronbach's  $\alpha > 0.6$ ) and were  
219 included in the analysis (Table 3). A descriptive analysis of male ( $n = 605$ ) versus female ( $n =$   
220  $4,178$ ) respondents was completed for the TPB scale and the WHO VHS scale (Table 4). In  
221 bivariable modeling, all responses in the WHO and TPB scales were significantly different in  
222 individuals who intended to be vaccinated and those who did not, and were included in the  
223 multivariable analysis (Table 2). In multivariable modeling (Table 2), participants who had higher

224 vaccine confidence and who perceived a lower vaccine risk were more likely to intend to receive  
225 a COVID-19 vaccine ( $p < 0.001$ ). In the TPB scales, respondents who intended to vaccinate had  
226 significantly higher vaccine attitudinal scores ( $p < 0.001$ ), reported greater influence of direct  
227 social norms on their decision to vaccinate, including belief that most people who are important  
228 to them would think they should receive the COVID-19 vaccine, and would expect them to  
229 receive the vaccine ( $p < 0.001$ ). Participants intending to be vaccinated were also significantly  
230 more likely to report greater influence of indirect social norms, including the opinions of family ( $p$   
231  $< 0.001$ ), their family physician or primary healthcare provider ( $p = 0.03$ ), and the Provincial  
232 Health Officer ( $p = 0.01$ ). Perceived behavioural controls and the influence of friends (indirect  
233 social norm) were not found to be predictors of intention to vaccinate.

## 234 **DISCUSSION**

235 To support COVID-19 vaccine implementation, this study investigated intention to receive the  
236 COVID-19 vaccine and determine predictors of COVID-19 vaccine uptake of adults living in BC.  
237 The majority (79.8%) of adults surveyed intend to receive a COVID-19 vaccine if available to the  
238 public and recommended for them. In multivariable modeling, older individuals (>60 years) were  
239 more likely to intend to receive the COVID-19 vaccine. However, other key populations including  
240 essential non-health care workers, those who identified as non-white or Indigenous, as well as  
241 those with less than high school education indicated that they are less likely to intend to receive  
242 a COVID-19 vaccine. From the WHO and TPB scales, we found that those who report higher  
243 lack of confidence in vaccines and higher perceived risk of vaccines were less likely to indicate  
244 an intention to vaccinate. As well, overall attitudes to vaccines and social norms were significant  
245 predictors of intention to receive a COVID-19 vaccine. When we adjusted the multivariable  
246 models for sex, only negligible changes were observed in the results (data not shown).  
247 Understanding population-level intention to receive the COVID-19 vaccine is critical to success  
248 of COVID-19 vaccination programs and ultimately COVID-19 pandemic control.<sup>2</sup>

249  
250 The study findings are consistent with results from unpublished polls in Canada investigating  
251 COVID-19 vaccine intention, which have found that the majority of Canadians intend to get a  
252 COVID-19 vaccine when it becomes available.<sup>2,25,26</sup> However, our findings contrast polls from  
253 the United States and the UK, which indicate that 57.6% and 53% of the population in those  
254 countries respectively intended to be vaccinated against COVID-19<sup>27,28</sup>

255  
256 Results from the WHO VHS and the TPB scales provide important insights to guide public  
257 health programming (Table 2). Specifically, to instill confidence in COVID-19 vaccines,  
258 messaging should focus on the benefit of vaccines, including their impact on society overall and

259 benefits to children, community, families and individuals. Information on vaccine safety from  
260 vaccine trials, as well as plans for ongoing, transparent monitoring and reporting of side effects  
261 of COVID-19 vaccines should be broadly shared to strengthen public confidence. As our  
262 findings show that family physicians and Provincial Public Health Officers are influential in  
263 vaccine decision making, public health leadership needs to utilize their influence to optimize  
264 COVID-19 vaccine coverage.

265  
266 Leading health authorities, such as the WHO, have identified the need to ensure that everyone  
267 is protected by full immunization regardless of socioeconomic and gender-related barriers.<sup>29</sup>  
268 While findings from our study indicate older individuals are more likely to plan to receive the  
269 vaccine, in both the overall and priority populations identified by NACI, intention to vaccinate is  
270 not close to 100%, indicating that strong vaccine messaging is still needed. In addition, key  
271 populations, including essential non-health care workers; non-white and Indigenous populations  
272 are less likely to intend to receive the vaccine. Public health leaders need to work specifically  
273 with these communities, to better understand their concerns and build confidence and trust in  
274 the vaccine program.

275  
276 Additional Canada-wide research is needed to understand vaccine intentions, to determine if  
277 vaccine intentions vary by province. Future research investigating COVID-19 vaccine intentions  
278 should continue to incorporate validated scales and established theoretical frameworks like the  
279 VHS and TPB, rather than relying on unvalidated online polls.

280

281 *Limitations*

282 This study included a population of individuals who were recruited from large health research  
283 cohorts, and has a higher percentage of respondents who identified as female, white, with more  
284 than high school education, and were more likely to live in the southern part of the province  
285 compared to the general population of BC.<sup>30</sup> While we had a lower than expected response rate,  
286 there was no observed differences in age distribution between the responders and non-  
287 responders.

288

289 *Conclusion*

290 Our study shows that while the majority of respondents intend to receive the COVID-19 vaccine,  
291 there are important factors associated with intention to vaccinate, which can guide vaccination  
292 policies and immunization programs, and provide valuable recommendations for vaccine priority  
293 groups captured in our study sample, specifically older age groups, health care workers and  
294 other essential workers. To our knowledge, this is the first study that has drawn from a large  
295 provincial sample in Canada, using established and rigorous theoretical frameworks to  
296 investigate intention to receive a COVID-19 vaccine.

297 **DECLARATIONS**

298 *Ethics approval and consent to participate*

299 Ethical approval was received from The University of British Columbia Research Ethics Board  
300 (H20-01421). Informed consent to participate was obtained from participants.

301

302 *Availability of data and materials*

303 The datasets generated and analyzed during the current study are not publicly available. At the  
304 time of consent participants were not advised that data might be made publicly available, and so  
305 we felt it was not appropriate to make the data publicly available. Aggregate data may be made  
306 available by the corresponding author upon reasonable request.

307

308 *Competing interests*

309 The authors declare that they have no competing interests.

310

311 *Funding*

312 This work was supported by the BC Women's Foundation (Vancouver, British Columbia).



**Figure 1: Study Participant CONSORT Diagram<sup>1</sup>**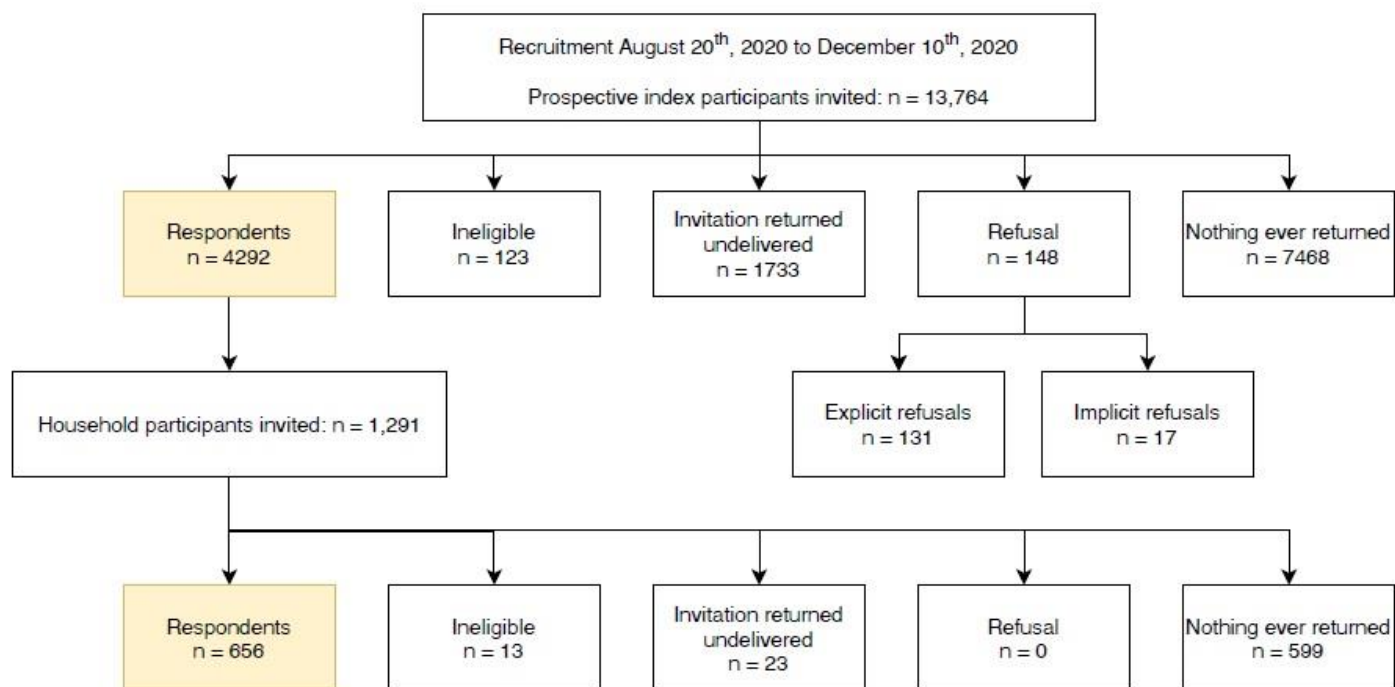<sup>1</sup> **American Association for Public Opinion Research:***Respondents:* number of complete and partial surveys*Ineligible:* those who did not meet the eligibility criteria (aged 25-69; resident of BC)*Invitation returned undelivered:* number of emails bounced back*Refusal:* those who declined to participate*Explicit refusals:* those who replied that they did not want to participate*Implicit refusals:* those who visited the survey URL but failed to complete any survey items*Nothing ever returned:* those who did not respond to the survey invites

**Table 1: Respondent Demographics (N=4,948)**

|                                                        | <b>Total</b>     |
|--------------------------------------------------------|------------------|
|                                                        | <b>N = 4,948</b> |
| <b>Age</b>                                             |                  |
| 25-30                                                  | 111 (2.2%)       |
| 30-40                                                  | 573 (11.6%)      |
| 40-50                                                  | 1,260 (25.5%)    |
| 50-60                                                  | 1,496 (30.2%)    |
| 60-70                                                  | 1,370 (27.7%)    |
| Missing                                                | 138 (2.8%)       |
| <b>Sex</b>                                             |                  |
| Female                                                 | 4,196 (84.8%)    |
| Male                                                   | 609 (12.3%)      |
| Missing                                                | 143 (2.9%)       |
| <b>Gender</b>                                          |                  |
| Woman                                                  | 4,159 (84.1%)    |
| Man                                                    | 597 (12.1%)      |
| Non-Binary, GenderQueer, Agender, Two-spirit, or other | 52 (1.1%)        |
| Missing                                                | 140 (2.8%)       |
| <b>Indigenous</b>                                      |                  |
| Indigenous                                             | 127 (2.6%)       |
| Not Indigenous                                         | 4,467 (90.3%)    |
| Prefer not to answer                                   | 34 (0.7%)        |
| Missing                                                | 320 (6.5%)       |
| <b>Asian<sup>1</sup></b>                               |                  |
| No                                                     | 4,563 (92.2%)    |
| Yes                                                    | 360 (7.3%)       |
| Missing                                                | 25 (0.5%)        |
| <b>Latin American</b>                                  |                  |
| Latin American                                         | 65 (1.3%)        |
| Not                                                    | 4,858 (98.2%)    |
| Missing                                                | 25 (0.5%)        |
| <b>South Asian<sup>2</sup></b>                         |                  |
| No                                                     | 4,826 (97.5%)    |
| Yes                                                    | 97 (2.0%)        |
| Missing                                                | 25 (0.5%)        |
| <b>Black</b>                                           |                  |
| No                                                     | 4,895 (98.9%)    |
| Yes                                                    | 28 (0.6%)        |
| Missing                                                | 25 (0.5%)        |

|                                                  |                  |
|--------------------------------------------------|------------------|
| <b>White</b>                                     |                  |
| Yes                                              | 4,089 (82.6%)    |
| No                                               | 834 (16.9%)      |
| Missing                                          | 25 (0.5%)        |
| <b>Education</b>                                 |                  |
| More than High School                            | 4,148 (83.8%)    |
| High School or less                              | 655 (13.2%)      |
| Missing                                          | 145 (2.9%)       |
| <b>Essential worker</b>                          |                  |
| No                                               | 3,302 (66.7%)    |
| Yes, health worker                               | 594 (12.0%)      |
| Yes, other essential worker                      | 910 (18.4%)      |
| Missing                                          | 142 (2.9%)       |
| <b>Number of Adults in Household</b>             |                  |
| One                                              | 1,151 (23.3%)    |
| Two                                              | 2,598 (52.5%)    |
| Three or more                                    | 1,050 (21.2%)    |
| Missing                                          | 149 (3.0%)       |
| <b>Children &lt; 5</b>                           |                  |
| None                                             | 4,349 (87.9%)    |
| One                                              | 273 (5.5%)       |
| Two or more                                      | 83 (1.7%)        |
| Missing                                          | 243 (4.9%)       |
| <b>Children 5-17</b>                             |                  |
| None                                             | 3,242 (65.5%)    |
| One                                              | 731 (14.8%)      |
| Two or more                                      | 760 (15.4%)      |
| Missing                                          | 215 (4.3%)       |
| <b>Chronic Health Conditions</b>                 |                  |
| None                                             | 2,302 (46.5%)    |
| One or more                                      | 2,490 (50.3%)    |
| Missing                                          | 156 (3.2%)       |
| <b>Do you think you had COVID-19</b>             |                  |
| No                                               | 4,290 (86.7%)    |
| Yes                                              | 534 (10.8%)      |
| Missing                                          | 124 (2.5%)       |
| <b>WHO scale: Lack of Confidence in Vaccines</b> |                  |
| Mean (SD)                                        | 1.3 ( $\pm$ 0.6) |
| Missing                                          | 170 (3.4%)       |
| <b>WHO scale: Vaccine Risks</b>                  |                  |
| Mean (SD)                                        | 3.0 ( $\pm$ 1.1) |

|                                                            |                    |
|------------------------------------------------------------|--------------------|
| Missing                                                    | 173 (3.5%)         |
| <b>Attitudes to COVID-19 Vaccine</b>                       |                    |
| Mean (SD)                                                  | 34.6 ( $\pm$ 5.8)  |
| Missing                                                    | 609 (12.3%)        |
| <b>Perceived Behavioural Control</b>                       |                    |
| Mean (SD)                                                  | 16.0 ( $\pm$ 2.6)  |
| Missing                                                    | 509 (10.3%)        |
| <b>Direct Social Norms</b>                                 |                    |
| Mean (SD)                                                  | 14.8 ( $\pm$ 3.3)  |
| Missing                                                    | 586 (11.8%)        |
| <b>Indirect Social Norms: Family Doctor/PHCP</b>           |                    |
| Mean (SD)                                                  | 6.0 ( $\pm$ 3.6)   |
| Missing                                                    | 563 (11.4%)        |
| <b>Indirect Social Norms: BC Provincial Health Officer</b> |                    |
| Mean (SD)                                                  | 6.7 ( $\pm$ 3.6)   |
| Missing                                                    | 562 (11.4%)        |
| <b>Indirect Social Norms: Coworkers</b>                    |                    |
| Mean (SD)                                                  | 4.4 ( $\pm$ 3.5)   |
| Missing                                                    | 1,797 (36.3%)      |
| <b>Indirect Social Norms: Employer</b>                     |                    |
| Mean (SD)                                                  | 5.2 ( $\pm$ 3.4)   |
| Missing                                                    | 1,777 (35.9%)      |
| <b>Indirect Social Norms: Educational Institution</b>      |                    |
| Mean (SD)                                                  | 4.7 ( $\pm$ 3.4)   |
| Missing                                                    | 2,899 (58.6%)      |
| <b>Indirect Social Norms: Friends</b>                      |                    |
| Mean (SD)                                                  | 4.1 ( $\pm$ 3.3)   |
| Missing                                                    | 556 (11.2%)        |
| <b>Indirect Social Norms: Family</b>                       |                    |
| Mean (SD)                                                  | 5.5 ( $\pm$ 3.7)   |
| Missing                                                    | 528 (10.7%)        |
| <b>Indirect Social Norms: Total</b>                        |                    |
| Mean (SD)                                                  | 22.4 ( $\pm$ 11.8) |
| Missing                                                    | 672 (13.6%)        |

<sup>1</sup> Asian: Chinese, Korean, Japanese, Filipino, Laotian, Cambodian, Vietnamese, etc.

<sup>2</sup> South Asian: Indian, Pakistani, Bangladeshi, Sri Lankan, Bhutanese, Nepalese, etc.

317 **Table 2:** Bivariable comparisons and multivariable models for demographic factors associated with intention to receive a  
 318 COVID-19 vaccine (N=4,787)  
 319

|                                                           | Likely to receive COVID-19 vaccine –<br>Bivariable comparisons* |                  |             |           | Likely to receive COVID-19 vaccine -<br>Multivariable model |             |           |
|-----------------------------------------------------------|-----------------------------------------------------------------|------------------|-------------|-----------|-------------------------------------------------------------|-------------|-----------|
|                                                           | % (95%CI)*                                                      | OR               | CI          | P-value** | OR                                                          | CI          | P-value** |
| <b>Age</b>                                                |                                                                 |                  |             |           |                                                             |             |           |
| 60-70                                                     | 84.2 (82.1 - 86.1)                                              | <i>reference</i> |             |           | <i>reference</i>                                            |             |           |
| 25-30                                                     | 85.6 (77.6 - 91.0)                                              | 1.12             | 0.64 - 1.95 | 0.7       | 1.42                                                        | 0.77 - 2.64 | 0.26      |
| 30-40                                                     | 75.5 (71.7 - 79.0)                                              | 0.58             | 0.45 - 0.74 | <0.0001   | 0.64                                                        | 0.49 - 0.83 | 0.0008    |
| 40-50                                                     | 78.8 (76.4 - 81.1)                                              | 0.7              | 0.57 - 0.86 | 0.0006    | 0.78                                                        | 0.62 - 0.97 | 0.02      |
| 50-60                                                     | 77.8 (75.6 - 79.9)                                              | 0.66             | 0.54 - 0.80 | <0.0001   | 0.67                                                        | 0.55 - 0.82 | 0.0001    |
| <b>Sex</b>                                                |                                                                 |                  |             |           |                                                             |             |           |
| Male                                                      | 84.6 (81.4 - 87.3)                                              | <i>reference</i> |             |           | <i>reference</i>                                            |             |           |
| Female                                                    | 79.2 (77.9 - 80.4)                                              | 0.7              | 0.55 - 0.88 | 0.003     | 0.7                                                         | 0.55 - 0.89 | 0.004     |
| Missing                                                   |                                                                 |                  |             |           |                                                             |             |           |
| <b>Gender</b>                                             |                                                                 |                  |             |           |                                                             |             |           |
| Woman                                                     | 79.0 (77.7 - 80.3)                                              | <i>reference</i> |             |           |                                                             |             |           |
| Man                                                       | 84.7 (81.5 - 87.4)                                              | 1.47             | 1.16 - 1.87 | 0.002     |                                                             |             |           |
| Non-Binary, GenderQueer,<br>Agender, Two-spirit, or other | 92.0 (80.3 - 97.0)                                              | 3.04             | 1.08 - 8.55 | 0.04      |                                                             |             |           |
| <b>Indigenous</b>                                         |                                                                 |                  |             |           |                                                             |             |           |
| Not Indigenous                                            | 80.5 (79.2 - 81.6)                                              | <i>reference</i> |             |           | <i>reference</i>                                            |             |           |
| Indigenous                                                | 66.5 (57.5 - 74.4)                                              | 0.48             | 0.32 - 0.71 | 0.0002    | 0.58                                                        | 0.38 - 0.87 | 0.009     |
| <b>Asian</b>                                              |                                                                 |                  |             |           |                                                             |             |           |
| No                                                        | 80.1 (78.8 - 81.3)                                              | <i>reference</i> |             |           |                                                             |             |           |
| Yes                                                       | 76.7 (71.9 - 80.9)                                              | 0.82             | 0.63 - 1.07 | 0.14      |                                                             |             |           |
| <b>South Asian</b>                                        |                                                                 |                  |             |           |                                                             |             |           |
| No                                                        | 80.1 (78.9 - 81.2)                                              | <i>reference</i> |             |           | <i>reference</i>                                            |             |           |
| Yes                                                       | 66.5 (56.2 - 75.5)                                              | 0.49             | 0.32 - 0.77 | 0.002     | 0.65                                                        | 0.39 - 1.07 | 0.09      |
| <b>Latin American</b>                                     |                                                                 |                  |             |           |                                                             |             |           |
| No                                                        | 79.9 (78.7 - 81.0)                                              | <i>reference</i> |             |           |                                                             |             |           |
| Yes                                                       | 75.3 (63.1 - 84.5)                                              | 0.77             | 0.43 - 1.37 | 0.37      |                                                             |             |           |

|                                      |                    |           |             |          |           |             |         |  |
|--------------------------------------|--------------------|-----------|-------------|----------|-----------|-------------|---------|--|
| <b>Black</b>                         |                    |           |             |          |           |             |         |  |
| No                                   | 79.9 (78.7 - 81.0) | reference |             |          |           |             |         |  |
| Yes                                  | 67.7 (48.1 - 82.6) | 0.53      | 0.23 - 1.20 | 0.13     |           |             |         |  |
| <b>White</b>                         |                    |           |             |          |           |             |         |  |
| Yes                                  | 80.8 (79.6 - 82.0) | reference |             |          | reference |             |         |  |
| No                                   | 73.8 (70.3 - 77.0) | 0.67      | 0.55 - 0.81 | < 0.0001 | 0.76      | 0.61 - 0.95 | 0.01    |  |
| <b>Education</b>                     |                    |           |             |          |           |             |         |  |
| More than High School                | 80.8 (79.6 - 82.0) | reference |             |          | reference |             |         |  |
| High School or less                  | 73.2 (69.6 - 76.6) | 0.65      | 0.53 - 0.79 | < 0.0001 | 0.62      | 0.51 - 0.77 | <0.0001 |  |
| <b>Essential worker</b>              |                    |           |             |          |           |             |         |  |
| No                                   | 80.9 (79.5 - 82.3) | reference |             |          | reference |             |         |  |
| Yes, health worker                   | 81.8 (78.5 - 84.8) | 1.06      | 0.84 - 1.34 | 0.61     | 1.1       | 0.86 - 1.40 | 0.45    |  |
| Yes, other essential worker          | 74.5 (71.5 - 77.3) | 0.69      | 0.58 - 0.82 | <0.0001  | 0.72      | 0.60 - 0.87 | 0.001   |  |
| <b>Chronic Health Conditions</b>     |                    |           |             |          |           |             |         |  |
| No chronic conditions                | 78.6 (76.9 - 80.3) | reference |             |          | reference |             |         |  |
| Any chronic condition                | 80.9 (79.3 - 82.5) | 1.15      | 1.00 - 1.33 | 0.05     | 1.14      | 0.98 - 1.32 | 0.10    |  |
| <b>Number of Adults in Household</b> |                    |           |             |          |           |             |         |  |
| One                                  | 78.4 (75.9 - 80.8) | reference |             |          |           |             |         |  |
| Two                                  | 81.3 (79.7 - 82.8) | 1.2       | 1.00 - 1.43 | 0.05     |           |             |         |  |
| Three or more                        | 77.8 (75.1 - 80.3) | 0.96      | 0.78 - 1.19 | 0.72     |           |             |         |  |
| <b>Children &lt; 5</b>               |                    |           |             |          |           |             |         |  |
| None                                 | 80.1 (78.9 - 81.3) | reference |             |          |           |             |         |  |
| One                                  | 77.2 (66.7 - 85.1) | 0.87      | 0.64 - 1.18 | 0.36     |           |             |         |  |
| Two or more                          | 77.8 (72.3 - 82.4) | 0.84      | 0.49 - 1.43 | 0.52     |           |             |         |  |
| <b>Children 5-17</b>                 |                    |           |             |          |           |             |         |  |
| None                                 | 80.3 (78.9 - 81.7) | reference |             |          |           |             |         |  |
| One                                  | 78.6 (75.4 - 81.5) | 0.9       | 0.74 - 1.11 | 0.32     |           |             |         |  |
| Two or more                          | 79.6 (76.5 - 82.4) | 0.96      | 0.78 - 1.17 | 0.67     |           |             |         |  |
| <b>Do you think you had COVID-19</b> |                    |           |             |          |           |             |         |  |
| No                                   | 80.3 (79.0 - 81.5) | reference |             |          | reference |             |         |  |
| Yes                                  | 76.2 (72.3 - 79.7) | 0.79      | 0.63 - 0.98 | 0.03     | 0.76      | 0.61 - 0.96 | 0.02    |  |

\*Estimated conditional proportions from mixed-effects models

\*\* P-values from Wald tests against reference category

**Table 3:** Results of psychological construct scales

| <b>Attitude or norm</b>                                                                                                 | <b>Mean score<br/>(SD)</b> | <b>Cronbach's<br/>Alpha</b> |
|-------------------------------------------------------------------------------------------------------------------------|----------------------------|-----------------------------|
| <b>Attitudes towards a COVID-19 vaccine (n= 4,205)</b>                                                                  |                            |                             |
| A COVID-19 vaccine would be beneficial                                                                                  | 4.6 (0.8)                  |                             |
| A COVID-19 vaccine would be beneficial for children                                                                     | 4.5 (0.9)                  |                             |
| A COVID-19 vaccine would be beneficial for individuals 60-years and older                                               | 4.7 (0.8)                  |                             |
| COVID-19 is a serious illness                                                                                           | 4.7 (0.8)                  |                             |
| A COVID-19 vaccine would be beneficial for the health of my community                                                   | 4.7 (0.8)                  |                             |
| A COVID-19 vaccine would be safe                                                                                        | 3.9 (0.9)                  |                             |
| A COVID-19 vaccine would be effecting in presenting COVID-19                                                            | 4.1 (0.9)                  |                             |
| A COVID-19 vaccine should be mandatory                                                                                  | 3.5 (1.3)                  |                             |
| Overall                                                                                                                 | 34.6 (5.8)                 | 0.91                        |
| <b>Direct Social norms (n= 4,224)</b>                                                                                   |                            |                             |
| Most people who are important to me would think that I should receive the COVID-19 vaccine                              | 4.2 (1.1)                  |                             |
| People who are important to me would expect me to receive the COVID-19 vaccine                                          | 4.1 (1.1)                  |                             |
| I would feel under social pressure to receive a COVID-19 vaccine                                                        | 3.1 (1.3)                  |                             |
| Everyone I know would get the COVID-19 vaccine                                                                          | 3.4 (1.1)                  |                             |
| Overall                                                                                                                 | 14.8 (3.3)                 | 0.69                        |
| <b>Indirect Social norms (n= 4,141)</b>                                                                                 |                            |                             |
| My family physician (or other primary Health Care Provider) would approve/disapprove of me receiving a COVID-19 vaccine | 1.4 (0.8)                  |                             |
| What my family physician (or other primary Health care Provider) thinks is important to me                              | 4.2 (0.8)                  |                             |
| The BC Public Health Officer would approve/disapprove of me receiving the COVID-19 vaccine                              | 1.5 (0.7)                  |                             |
| What the BC Public Health Officer recommends is important to follow                                                     | 4.3 (0.8)                  |                             |
| My coworkers would approve/disapprove of me receiving the COVID-19 vaccine                                              | 1.2 (0.9)                  |                             |
| What my coworkers think is important to me                                                                              | 3.4 (1.0)                  |                             |
| My employer/work institution would approve/disapprove of me receiving the COVID-19 vaccine                              | 1.3 (0.8)                  |                             |
| What my employer/work institution thinks is important to me                                                             | 3.6 (0.9)                  |                             |

|                                                                                                                                                                                        |              |      |
|----------------------------------------------------------------------------------------------------------------------------------------------------------------------------------------|--------------|------|
| The educational institution (elementary/high school/college/university) that I or my children attend/are associated with would approve/disapprove of me receiving the COVID-19 vaccine | 1.3 (0.8)    |      |
| What my school/children's school thinks is important to me                                                                                                                             | 3.5 (0.9)    |      |
| My friends would approve/disapprove of me receiving the COVID-19 vaccine                                                                                                               | 1.1 (0.8)    |      |
| What my friends think is important to me                                                                                                                                               | 3.6 (0.8)    |      |
| My family would approve/disapprove of me receiving the COVID-19 vaccine                                                                                                                | 1.3 (0.8)    |      |
| What my family thinks is important to me                                                                                                                                               | 4.2 (0.8)    |      |
| Overall                                                                                                                                                                                | 22.4 (11.8)* | 0.89 |

**Perceived Behavioural Controls (n= 4,300)**

|                                                                                          |            |      |
|------------------------------------------------------------------------------------------|------------|------|
| It would be difficult to receive the COVID-19 vaccine                                    | 3.9 (1.0)  |      |
| I could easily receive a COVID-19 vaccine if I wanted to                                 | 4.0 (0.9)  |      |
| It would be completely up to me whether I received the COVID-19 vaccine                  | 3.9 (1.0)  |      |
| How much control do you feel you would have over whether you receive a COVID-19 vaccine? | 4.2 (1.0)  |      |
| Overall                                                                                  | 16.1 (2.6) | 0.62 |

---

\*Does not include items for: coworkers, employers, or education, due to missing data



323 **Table 4:** Bivariable comparisons and multivariable models for VHS and TPB variables associated with intention to receive  
 324 a COVID-19 vaccine (N=4,787)  
 325

|                                                  | Likely to receive COVID-19 vaccine –<br>Bivariable comparisons |                   |      |             |           | Likely to receive COVID-19 vaccine<br>- Multivariable model |             |           |
|--------------------------------------------------|----------------------------------------------------------------|-------------------|------|-------------|-----------|-------------------------------------------------------------|-------------|-----------|
|                                                  | No*<br>N = 967                                                 | Yes*<br>N = 3,820 | OR   | CI          | P-value** | OR                                                          | CI          | P-value** |
| <b>WHO scale: Lack of Confidence in Vaccines</b> |                                                                |                   |      |             |           |                                                             |             |           |
| Mean (SD)                                        | 1.6 (±0.9)                                                     | 1.2 (±0.5)        | 0.35 | 0.31 - 0.40 | < 0.0001  | 0.66                                                        | 0.57 - 0.75 | < 0.0001  |
| Missing                                          | 7 (0.7%)                                                       | 7 (0.2%)          |      |             |           |                                                             |             |           |
| <b>WHO scale: Vaccine Risks</b>                  |                                                                |                   |      |             |           |                                                             |             |           |
| Mean (SD)                                        | 3.5 (±1.0)                                                     | 2.9 (±1.0)        | 0.53 | 0.49 - 0.57 | < 0.0001  | 0.72                                                        | 0.66 - 0.80 | < 0.0001  |
| Missing                                          | 7 (0.7%)                                                       | 10 (0.3%)         |      |             |           |                                                             |             |           |
| <b>Attitudes to COVID-19 Vaccine</b>             |                                                                |                   |      |             |           |                                                             |             |           |
| Mean (SD)                                        | 30.3 (±6.9)                                                    | 35.7 (±4.9)       | 1.15 | 1.14 - 1.17 | < 0.0001  | 1.06                                                        | 1.04 - 1.08 | < 0.0001  |
| Missing                                          | 108 (11.2%)                                                    | 345 (9.0%)        |      |             |           |                                                             |             |           |
| <b>Perceived Behavioural Control</b>             |                                                                |                   |      |             |           |                                                             |             |           |
| Mean (SD)                                        | 15.6 (±2.6)                                                    | 16.2 (±2.6)       | 1.08 | 1.05 - 1.12 | < 0.0001  | 1.00                                                        | 0.97 - 1.04 | 0.92      |
| Missing                                          | 77 (8.0%)                                                      | 277 (7.3%)        |      |             |           |                                                             |             |           |
| <b>Direct Social Norms</b>                       |                                                                |                   |      |             |           |                                                             |             |           |
| Mean (SD)                                        | 12.7 (±3.7)                                                    | 15.3 (±3.0)       | 1.26 | 1.23 - 1.29 | < 0.0001  | 1.06                                                        | 1.03 - 1.08 | 0.0004    |
| Missing                                          | 99 (10.2%)                                                     | 332 (8.7%)        |      |             |           |                                                             |             |           |
| <b>Indirect Social Norms: Family Doctor/PHCP</b> |                                                                |                   |      |             |           |                                                             |             |           |
| Mean (SD)                                        | 3.7 (±3.8)                                                     | 6.6 (±3.3)        | 1.26 | 1.23 - 1.30 | < 0.0001  | 1.04                                                        | 1.00 - 1.08 | 0.03      |
| Missing                                          | 107 (11.1%)                                                    | 300 (7.9%)        |      |             |           |                                                             |             |           |

**Indirect Social Norms: BC  
Provincial Health Officer**

|                                                           |              |               |      |             |          |      |             |          |
|-----------------------------------------------------------|--------------|---------------|------|-------------|----------|------|-------------|----------|
| Mean (SD)                                                 | 4.3 (±3.8)   | 7.2 (±3.3)    | 1.24 | 1.22 - 1.27 | < 0.0001 | 1.04 | 1.01 - 1.08 | 0.01     |
| Missing                                                   | 110 (11.4%)  | 296 (7.7%)    |      |             |          |      |             |          |
| <b>Indirect Social Norms:<br/>Coworkers</b>               |              |               |      |             |          |      |             |          |
| Mean (SD)                                                 | 2.7 (±3.3)   | 4.8 (±3.4)    | 1.2  | 1.17 - 1.24 | < 0.0001 |      |             |          |
| Missing                                                   | 339 (35.1%)  | 1,302 (34.1%) |      |             |          |      |             |          |
| <b>Indirect Social Norms:<br/>Employer</b>                |              |               |      |             |          |      |             |          |
| Mean (SD)                                                 | 3.5 (±3.5)   | 5.6 (±3.3)    | 1.2  | 1.18 - 1.24 | < 0.0001 |      |             |          |
| Missing                                                   | 342 (35.4%)  | 1,279 (33.5%) |      |             |          |      |             |          |
| <b>Indirect Social Norms:<br/>Educational Institution</b> |              |               |      |             |          |      |             |          |
| Mean (SD)                                                 | 3.0 (±3.3)   | 5.2 (±3.3)    | 1.22 | 1.18 - 1.26 | < 0.0001 |      |             |          |
| Missing                                                   | 551 (57.0%)  | 2,190 (57.3%) |      |             |          |      |             |          |
| <b>Indirect Social Norms:<br/>Friends</b>                 |              |               |      |             |          |      |             |          |
| Mean (SD)                                                 | 2.0 (±3.2)   | 4.6 (±3.1)    | 1.32 | 1.28 - 1.36 | < 0.0001 | 1.04 | 0.99 - 1.08 | 0.1      |
| Missing                                                   | 102 (10.5%)  | 299 (7.8%)    |      |             |          |      |             |          |
| <b>Indirect Social Norms:<br/>Family</b>                  |              |               |      |             |          |      |             |          |
| Mean (SD)                                                 | 2.9 (±3.9)   | 6.2 (±3.3)    | 1.31 | 1.27 - 1.34 | < 0.0001 | 1.09 | 1.06 - 1.13 | < 0.0001 |
| Missing                                                   | 95 (9.8%)    | 278 (7.3%)    |      |             |          |      |             |          |
| <b>Indirect Social Norms:<br/>Total</b>                   |              |               |      |             |          |      |             |          |
| Mean (SD)                                                 | 13.0 (±12.6) | 24.8 (±10.4)  | 1.1  | 1.09 - 1.10 | < 0.0001 |      |             |          |
| Missing                                                   | 125 (12.9%)  | 390 (10.2%)   |      |             |          |      |             |          |

\* Raw means and SD

\*\* P-values from Wald tests

327 **Table 5:** Comparison of psychological constructs (WHO VHS scale and TPB  
 328 framework) by sex  
 329

|                                                            | <b>Female</b>      | <b>Male</b>        |
|------------------------------------------------------------|--------------------|--------------------|
|                                                            | <b>No. 4,178</b>   | <b>No. 605</b>     |
| <b>WHO scale: Lack of Confidence in Vaccines</b>           |                    |                    |
| Mean (SD)                                                  | 1.3 ( $\pm 0.6$ )  | 1.3 ( $\pm 0.6$ )  |
| Missing                                                    | 12 (0.3%)          | 2 (0.3%)           |
| <b>WHO scale: Vaccine Risks</b>                            |                    |                    |
| Mean (SD)                                                  | 3.1 ( $\pm 1.1$ )  | 2.7 ( $\pm 1.1$ )  |
| Missing                                                    | 15 (0.4%)          | 2 (0.3%)           |
| <b>Attitudes to COVID-19 Vaccine</b>                       |                    |                    |
| Mean (SD)                                                  | 34.5 ( $\pm 5.8$ ) | 35.4 ( $\pm 5.7$ ) |
| Missing                                                    | 403 (9.6%)         | 50 (8.3%)          |
| <b>Perceived Behavioural Control</b>                       |                    |                    |
| Mean (SD)                                                  | 16.0 ( $\pm 2.6$ ) | 16.2 ( $\pm 2.6$ ) |
| Missing                                                    | 314 (7.5%)         | 40 (6.6%)          |
| <b>Direct Social Norms</b>                                 |                    |                    |
| Mean (SD)                                                  | 14.7 ( $\pm 3.3$ ) | 15.5 ( $\pm 3.0$ ) |
| Missing                                                    | 383 (9.2%)         | 48 (7.9%)          |
| <b>Indirect Social Norms: Family Doctor/PHCP</b>           |                    |                    |
| Mean (SD)                                                  | 5.9 ( $\pm 3.6$ )  | 6.8 ( $\pm 3.5$ )  |
| Missing                                                    | 365 (8.7%)         | 42 (6.9%)          |
| <b>Indirect Social Norms: BC Provincial Health Officer</b> |                    |                    |
| Mean (SD)                                                  | 6.6 ( $\pm 3.6$ )  | 7.1 ( $\pm 3.3$ )  |
| Missing                                                    | 363 (8.7%)         | 43 (7.1%)          |
| <b>Indirect Social Norms: Coworkers</b>                    |                    |                    |
| Mean (SD)                                                  | 4.3 ( $\pm 3.5$ )  | 4.9 ( $\pm 3.5$ )  |
| Missing                                                    | 1,461 (35.0%)      | 180 (29.8%)        |
| <b>Indirect Social Norms: Employer</b>                     |                    |                    |
| Mean (SD)                                                  | 5.1 ( $\pm 3.4$ )  | 5.5 ( $\pm 3.2$ )  |
| Missing                                                    | 1,441 (34.5%)      | 180 (29.8%)        |
| <b>Indirect Social Norms: Educational Institution</b>      |                    |                    |
| Mean (SD)                                                  | 4.6 ( $\pm 3.4$ )  | 5.5 ( $\pm 3.4$ )  |
| Missing                                                    | 2,416 (57.8%)      | 323 (53.4%)        |
| <b>Indirect Social Norms: Friends</b>                      |                    |                    |

|                                      |                    |                    |
|--------------------------------------|--------------------|--------------------|
| Mean (SD)                            | 4.0 ( $\pm$ 3.3)   | 4.7 ( $\pm$ 3.0)   |
| Missing                              | 357 (8.5%)         | 44 (7.3%)          |
| <b>Indirect Social Norms: Family</b> |                    |                    |
| Mean (SD)                            | 5.4 ( $\pm$ 3.7)   | 6.3 ( $\pm$ 3.5)   |
| Missing                              | 334 (8.0%)         | 39 (6.4%)          |
| <b>Indirect Social Norms: Total</b>  |                    |                    |
| Mean (SD)                            | 22.1 ( $\pm$ 11.9) | 24.8 ( $\pm$ 10.9) |
| Missing                              | 459 (11.0%)        | 56 (9.3%)          |

330

## REFERENCES

- 1) van Riel D, de Wit E. Next-generation vaccine platforms for COVID-19. *Nat Mater* [Internet]. 2020 Jul;19(8):810-2. Available from: <https://www.nature.com/articles/s41563-020-0746-0>
- 2) Frank K, Arim R. Statistics Canada. Canadians' willingness to get a COVID-19 vaccine: Group differences and reasons for vaccine hesitancy [Internet]. Ottawa: Statistics Canada Catalogue no. 45280001. 2020 Aug 25 [cited 2020 Oct 22]. Available from: <https://www150.statcan.gc.ca/n1/pub/45-28-0001/2020001/article/00073-eng.htm>
- 3) Polack F, Thomas S, Kitchin N, Absalon J, Gurtman A, Lockhart S, et al. Safety and Efficacy of the BNT162b2 mRNA Covid-19 Vaccine. *New England Journal of Medicine* [Internet]. 2020;. Available from: <http://dx.doi.org/10.1056/NEJMoa2034577>
- 4) Moderna. Moderna's COVID-19 Vaccine Candidate Meets its Primary Efficacy Endpoint in the First Interim Analysis of the Phase 3 COVE Study [Press Release]. 2020 Nov 16 [cited 2020 Nov 17]. Available from: <https://investors.modernatx.com/news-releases/news-release-details/modernas-covid-19-vaccine-candidate-meets-its-primary-efficacy>
- 5) World Health Organization. WHO SAGE values framework for the allocation and prioritization of COVID-19 vaccination [Internet]. 2020 Sep 14 [cited 2020 Oct 22]. Available from: <https://www.who.int/publications/i/item/who-sage-values-framework-for-the-allocation-and-prioritization-of-covid-19-vaccination>
- 6) Bell BP, Romero JR, Lee GM. Scientific and ethical principles underlying recommendations from the advisory committee on immunization practices for COVID-19 vaccination implementation. *JAMA* [Internet]. 2020 Oct 22 [cited 2020 Oct 26]; Available from: <https://jamanetwork.com/journals/jama/fullarticle/2772326>
- 7) NACI. Public Health Agency of Canada. COVID-19: Preliminary guidance on key populations for early immunization - Canada.ca [Internet]. Canada.ca. 2020 [cited 2020 Nov 10]. Available from: <https://www.canada.ca/en/public-health/services/immunization/national-advisory-committee-on-immunization-naci/guidance-key-populations-early-covid-19-immunization.html>
- 8) Shapiro GK, Tatar O, Dube E, Amsel R, Knauper B, Naz A, et al. The vaccine hesitancy scale: Psychometric properties and validation. *Vaccine* [Internet]. 2018;36(5):660–7. Available from: <http://dx.doi.org/10.1016/j.vaccine.2017.12.043>
- 9) World Health Organization. Report of the SAGE working group on vaccine hesitancy [Internet]. 2014 Oct 1 [cited 2020 Oct 22]. Available from: [https://www.who.int/immunization/sage/meetings/2014/october/1\\_Report\\_WORKING\\_GROUP\\_vaccine\\_hesitancy\\_final.pdf](https://www.who.int/immunization/sage/meetings/2014/october/1_Report_WORKING_GROUP_vaccine_hesitancy_final.pdf)

- 10) Kerrigan AR, Aitnouri I, Mar J, Altman W. What barriers exist in the minds of vaccine-hesitant parents, and how can we address them? *Fam Med* [Internet]. 2020;52(9):626–30. Available from: <http://dx.doi.org/10.22454/fammed.2020.432940>
- 11) Suppli CH, Hansen ND, Rasmussen M, Valentiner-Branth P, Krause TG, Molbak K. Decline in HPV-vaccination uptake in Denmark - the association between HPV-related media coverage and HPV-vaccination. *BMC Public Health* [Internet]. 2018;18(1):1360. Available from: <http://dx.doi.org/10.1186/s12889-018-6268-x>
- 12) Dubé E, Vivion M, MacDonald NE. Vaccine hesitancy, vaccine refusal and the anti-vaccine movement: influence, impact and implications. *Expert Rev Vaccines* [Internet]. 2015;14(1):99–117. Available from: <http://dx.doi.org/10.1586/14760584.2015.964212>
- 13) Smith MJ. Promoting vaccine confidence. *Infect Dis Clin North Am* [Internet]. 2015;29(4):759–69. Available from: <http://dx.doi.org/10.1016/j.idc.2015.07.004>
- 14) COVID-19 RESPPonSe Study – Women’s Health Research Institute [Internet]. 2020 [cited 2020 Oct 25]. Available from: <http://whri.org/covid-19-respponse-study/>
- 15) Ajzen I. The theory of planned behavior. *Organ Behav Hum Decis Process* [Internet]. 1991;50(2):179–211. Available from: [http://dx.doi.org/10.1016/0749-5978\(91\)90020-t](http://dx.doi.org/10.1016/0749-5978(91)90020-t)
- 16) Ogilvie GS, Smith LW, van Niekerk DJ, Khurshed F, Kraiden M, Saraiya M, et al. Women’s intentions to receive cervical cancer screening with primary human papillomavirus testing. *Int J Cancer* [Internet]. 2013;133(12):2934–43. Available from: <http://dx.doi.org/10.1002/ijc.28324>
- 17) Corace KM, Srigley JA, Hargadon DP, Yu D, MacDonald TK, Fabrigar LR, et al. Using behavior change frameworks to improve healthcare worker influenza vaccination rates: A systematic review. *Vaccine* [Internet]. 2016;34(28):3235–42. Available from: <http://dx.doi.org/10.1016/j.vaccine.2016.04.071>
- 18) Godin G, Vézina-Im L-A, Naccache H. Determinants of influenza vaccination among healthcare workers. *Infect Control Hosp Epidemiol* [Internet]. 2010;31(7):689–93. Available from: <http://dx.doi.org/10.1086/653614>
- 19) Ogilvie G, Anderson M, Marra F, McNeil S, Pielak K, Dawar M, McIvor M, Ehlen T, Dobson S, Money D, Patrick DM, Naus M. A population-based evaluation of a publicly funded, school-based HPV vaccine program in British Columbia, Canada: Parental factors associated with HPV vaccine receipt. *PLoS Med* [Internet]. 2010;7(5):e1000270. Available from: <http://dx.doi.org/10.1371/journal.pmed.1000270>
- 20) Ogilvie GS, Remple VP, Marra F, McNeil SA, Naus M, Pielak KL, Ehlen TG, Dobson SR, Money DM, Patrick DM. Parental intention to have daughters receive the human papillomavirus vaccine. *CMAJ* [Internet]. 2007;177(12):1506–12. Available from: <http://dx.doi.org/10.1503/cmaj.071022>

- 21) Harris PA, Taylor R, Thielke R, Payne J, Gonzalez N, Conde JG. Research electronic data capture (REDCap)--a metadata-driven methodology and workflow process for providing translational research informatics support. *J Biomed Inform* [Internet]. 2009 Apr;42(2):377–81. Available from: <http://dx.doi.org/10.1016/j.jbi.2008.08.010>
- 22) The American Association for Public Opinion Research. Final disposition of case codes and outcome rates for surveys. Rev ed. 9 [Internet]. 2016 [cited 2020 Oct 30]. Available from: [https://www.aapor.org/AAPOR\\_Main/media/publications/Standard-Definitions20169theditionfinal.pdf](https://www.aapor.org/AAPOR_Main/media/publications/Standard-Definitions20169theditionfinal.pdf)
- 23) Fine P, Eames K, Heymann DL. “Herd immunity”: a rough guide. *Clin Infect Dis* [Internet]. 2011;52(7):911–6. Available from: <http://dx.doi.org/10.1093/cid/cir007>
- 24) R Core Team. The R Project for Statistical Computing: v.4.0.2 [Internet]. 2020 [cited 2020 Nov 16]. Available from: <https://www.R-project.org/>
- 25) Frank K, Arim R. Statistics Canada. Canadians’ willingness to get a COVID-19 vaccine when one becomes available: What role does trust play? [Internet]. Ottawa: Statistics Canada Catalogue no. 45280001. 2020 Jul 7 [cited 2020 Oct 22]. Available from: <https://www150.statcan.gc.ca/n1/pub/45-28-0001/2020001/article/00043-eng.htm>
- 26) Angus Reid Institute. COVID-19: Three-in-five worry about side-effects of a vaccine; many plan to take a ‘wait and see’ approach [Internet]. 2020 Aug 4 [cited 2020 Nov 1]. Available from: <http://angusreid.org/coronavirus-vaccine/>
- 27) Fisher KA, Bloomstone SJ, Walder J, Crawford S, Fouayzi H, Mazor KM. Attitudes toward a potential SARS-CoV-2 vaccine: A survey of U.S. adults. *Ann Intern Med* [Internet]. 2020; Available from: <http://dx.doi.org/10.7326/M20-3569>
- 28) McKie R. Covid-19: only half of Britons would definitely have vaccination. *The guardian* [Internet]. 2020 Aug 9 [cited 2020 Oct 30]; Available from: <http://www.theguardian.com/world/2020/aug/09/only-half-of-britons-would-definitely-have-covid-19-vaccination>
- 29) [World Health Organization. Immunization Agenda 2030 \[Internet\]. 2020 Apr 2 \[cited 2020 Nov 23\]. Available from: who.int/teams/immunization-vaccines-and-biologicals/strategies/ia2030](#)
- 30) Statistics Canada. Census Profile, 2016 Census: British Columbia and Canada [Internet]. Ottawa: Statistics Canada; 2016 [cited 2020 Nov 22]. Available from: <https://www12.statcan.gc.ca/census-recensement/2016/dp-pd/prof/details/page.cfm?Lang=E&Geo1=PR&Code1=59&Geo2=PR&Code2=01&SearchText=british%20columbia&SearchType=Begins&SearchPR=01&B1=All&TABID=1&type=0>
